# Supplementary material for: High pressure synthesis of phosphine from the elements and the discovery of the missing (PH3)2H2 tile
Source: PubMed Central journal article supplement (PMC7705733; doi:10.1038/s41467-020-19745-2), 2020-11-30
Supplement: 41467_2020_19745_MOESM1_ESM.pdf [file 41467_2020_19745_MOESM1_ESM.pdf]

# Supplementary Information

## High pressure synthesis of phosphine from the elements and the discovery of the missing $(\text{PH}_3)_2\text{H}_2$ tile

Matteo Ceppatelli,<sup>\*,†,‡</sup> Demetrio Scelta,<sup>†,‡</sup> Manuel Serrano-Ruiz,<sup>‡</sup> Kamil  
Dziubek,<sup>†,‡</sup> Gaston Garbarino,<sup>¶</sup> Jeroen Jacobs,<sup>¶</sup> Mohamed Mezouar,<sup>¶</sup> Roberto  
Bini,<sup>†,‡,§</sup> and Maurizio Peruzzini<sup>‡</sup>

<sup>†</sup>*LENS, European Laboratory for Non-linear Spectroscopy, Via N. Carrara 1, I-50019 Sesto  
Fiorentino, Firenze, Italy*

<sup>‡</sup>*ICCOM-CNR, Institute of Chemistry of OrganoMetallic Compounds, National Research  
Council of Italy, Via Madonna del Piano 10, I-50019 Sesto Fiorentino, Firenze, Italy*

<sup>¶</sup>*ESRF, European Synchrotron Radiation Facility, 71 Avenue des Martyrs, 38000 Grenoble,  
France*

<sup>§</sup>*Dipartimento di Chimica “Ugo Schiff” dell’Università degli Studi di Firenze, Via della  
Lastruccia 3, I-50019 Sesto Fiorentino, Firenze, Italy*

E-mail: [matteo.ceppatelli@iccom.cnr.it](mailto:matteo.ceppatelli@iccom.cnr.it), [ceppa@lens.unifi.it](mailto:ceppa@lens.unifi.it)

# Supplementary Note 1

**X-Ray Diffraction (XRD).** Dioptas software<sup>1</sup> was used to integrate the 2D area images to 1D patterns during the experiment. For the single crystal data set collected at 5.5 GPa the diffraction images were imported into a CrysAlisPro suite<sup>2</sup> and processed accordingly. The crystal structure was subsequently solved by direct methods and then refined on  $F^2$  by full-matrix least-squares procedures using the SHELXL package.<sup>3</sup> The results are reported in the following Supplementary Tables 1, 2 and 3.

Supplementary Table 1: Experimental crystallographic refinement details for the  $(\text{PH}_3)_2\text{H}_2$  van der Waals compound at room T and 5.5 GPa.

|                                          |                    |
|------------------------------------------|--------------------|
| Crystal system                           | Tetragonal         |
| Space group                              | $I4cm$             |
| Space group IT number                    | 108                |
| $a$ (Å)                                  | 7.6075 (6)         |
| $b$ (Å)                                  | 7.6075 (6)         |
| $c$ (Å)                                  | 6.3303 (13)        |
| $V$ (Å <sup>3</sup> )                    | 366.36 (9)         |
| $d$ (g cm <sup>-3</sup> )                | 1.269              |
| abs. coeff (mm <sup>-1</sup> )           | 0.451              |
| $\theta$ range (degree)                  | 3.576-11.689       |
| Limiting $h$ index                       | $-7 \leq h \leq 7$ |
| Limiting $k$ index                       | $-7 \leq k \leq 8$ |
| Limiting $l$ index                       | $-4 \leq l \leq 5$ |
| No. of measured reflections              | 175                |
| No. of independent reflections           | 89                 |
| No. of reflections with $I > 2\sigma(I)$ | 73                 |
| No. of parameters                        | 4                  |
| $R_{int}$                                | 0.054              |
| $R[F^2, \text{all data}]$                | 0.068              |
| $R[F^2 > 2\sigma(F^2)]$                  | 0.058              |
| w $R(F^2)$                               | 0.158              |
| Goodness of fit                          | 1.24               |
| Highest diff. peak (e/Å <sup>3</sup> )   | 0.316              |
| Deepest diff. hole (e/Å <sup>3</sup> )   | -0.334             |

Supplementary Table 2: Fractional atomic coordinates and isotropic displacement parameters determined from the experimental crystallographic refinement of the  $(\text{PH}_3)_2\text{H}_2$  van der Waals compound at room T and 5.5 GPa. Due to the low X-ray scattering cross-section of hydrogen and severe restrictions on data completeness implied by the diamond anvil cell,  $\text{PH}_3$  and  $\text{H}_2$  sites were modeled as P and H atoms, respectively.

|   | $x$       | $y$       | $z$  | $U_{iso}$  |
|---|-----------|-----------|------|------------|
| P | 0.1677(3) | 0.6677(3) | 0    | 0.0650(18) |
| H | 0         | 0         | 0.25 | 0.03(3)    |

Supplementary Table 3: First and second neighbor  $\text{PH}_3 \cdots \text{PH}_3$ ,  $\text{PH}_3 \cdots \text{H}_2$  and  $\text{H}_2 \cdots \text{H}_2$  intermolecular distances determined from the experimental crystallographic refinement of the  $(\text{PH}_3)_2\text{H}_2$  van der Waals compound at room T and 5.5 GPa (calculated between the corresponding centers of mass). Due to the low X-ray scattering cross-section of hydrogen and severe restrictions on data completeness implied by the diamond anvil cell,  $\text{PH}_3$  and  $\text{H}_2$  sites were modeled as P and H atoms, respectively.

| Distance                          | Length (Å) | Symmetry code               |
|-----------------------------------|------------|-----------------------------|
| $\text{P} \cdots \text{P}_i$      | 3.608(6)   | $i = -x, 1-y, z$            |
| $\text{P} \cdots \text{P}_{ii}$   | 3.627(3)   | $ii = 1-y, 1-x, -1/2+z$     |
| $\text{P} \cdots \text{P}_{iii}$  | 3.627(3)   | $iii = 1-y, 1-x, 1/2+z$     |
| $\text{P} \cdots \text{H}_{iv}$   | 3.2439(8)  | $iv = x, 1+y, z$            |
| $\text{P} \cdots \text{H}_v$      | 3.2439(8)  | $v = -x, 1+y, -1/2+z$       |
| $\text{P} \cdots \text{H}_{vi}$   | 3.2439(8)  | $vi = 1/2+x, 1/2+y, -1/2+z$ |
| $\text{P} \cdots \text{H}_{vii}$  | 3.2439(8)  | $vii = 1/2-x, 1/2+y, z$     |
| $\text{P} \cdots \text{H}_{viii}$ | 5.471(2)   | $viii = x, y, z$            |
| $\text{P} \cdots \text{H}_{ix}$   | 5.471(2)   | $ix = -x, y, -1/2+z$        |
| $\text{P} \cdots \text{H}_x$      | 5.471(2)   | $x = -1/2+x, 1/2+y, -1/2+z$ |
| $\text{P} \cdots \text{H}_{xi}$   | 5.471(2)   | $xi = -1/2-x, 1/2+y, z$     |
| $\text{H} \cdots \text{H}_{xii}$  | 3.1652(6)  | $xii = -x, y, 1/2+z$        |
| $\text{H} \cdots \text{H}_{xiii}$ | 3.1652(6)  | $xiii = -x, y, -1/2+z$      |
| $\text{H} \cdots \text{H}_{xiv}$  | 5.3793(4)  | $xiv = -1/2-x, -1/2+y, z$   |
| $\text{H} \cdots \text{H}_{xv}$   | 5.3793(4)  | $xv = -1/2-x, 1/2+y, z$     |
| $\text{H} \cdots \text{H}_{xvi}$  | 5.3793(4)  | $xvi = 1/2-x, -1/2+y, z$    |
| $\text{H} \cdots \text{H}_{xvii}$ | 5.3793(4)  | $xvii = 1/2-x, 1/2+y, z$    |

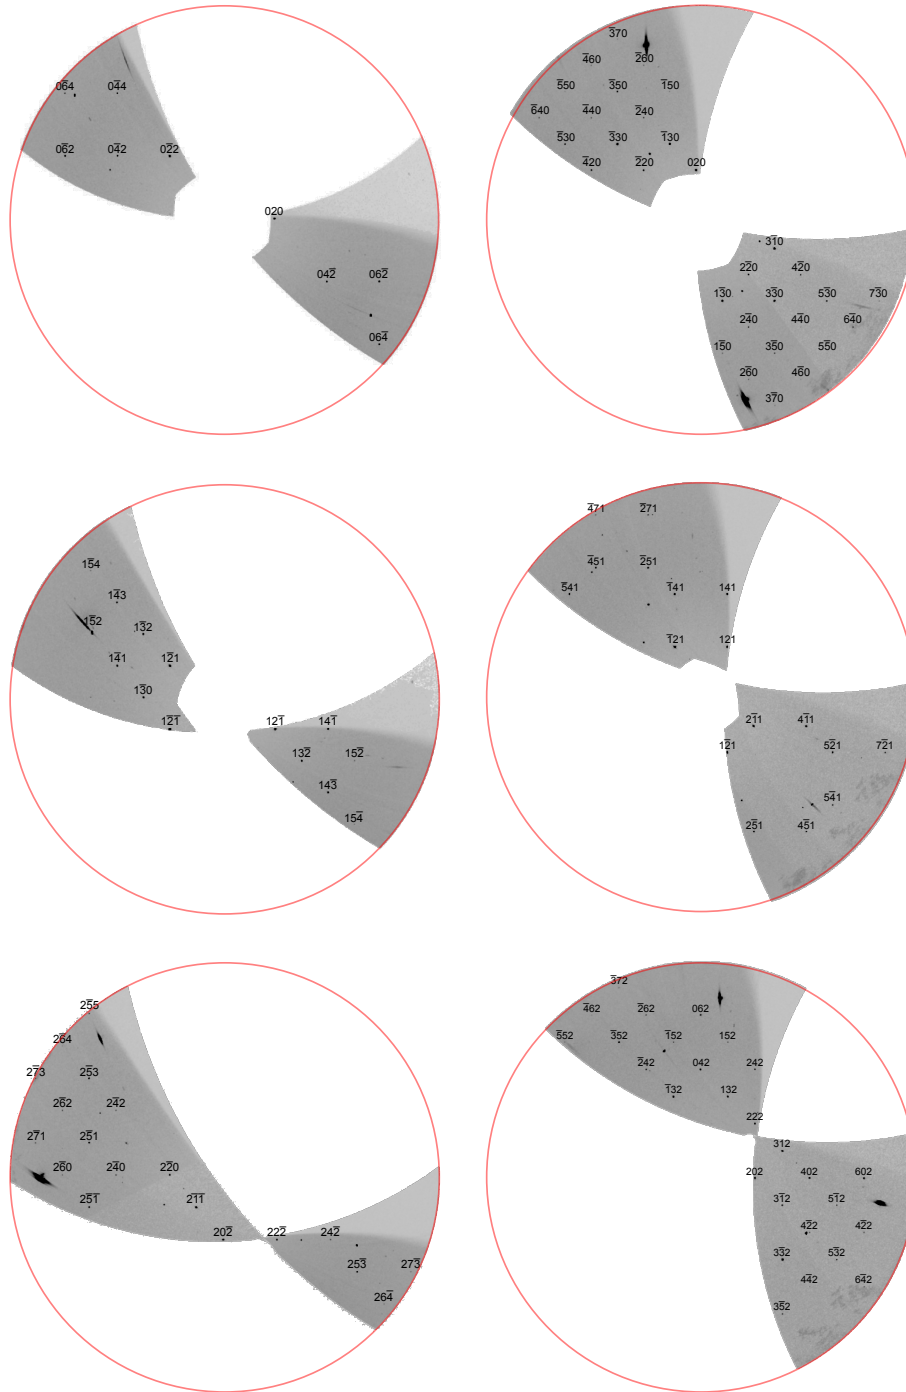

Supplementary Figure 1: The  $0kl$ ,  $1kl$ ,  $2kl$  (left) and  $hk0$ ,  $hk1$ ,  $hk2$  (right) layers of reciprocal space of  $(\text{PH}_3)_2\text{H}_2$  reconstructed from diffraction images collected using a 2D CCD detector which demonstrate the tetragonal symmetry of the diffraction pattern. Note that the systematic absences are in a perfect agreement with the  $I4cm$  space group symmetry. No diffuse scattering or satellite reflections are revealed. Additional spots and features placed out of the reciprocal lattice nodes can be attributed either to differently oriented crystal grains present in the part of the sample illuminated by X-rays or to the diamond anvils.

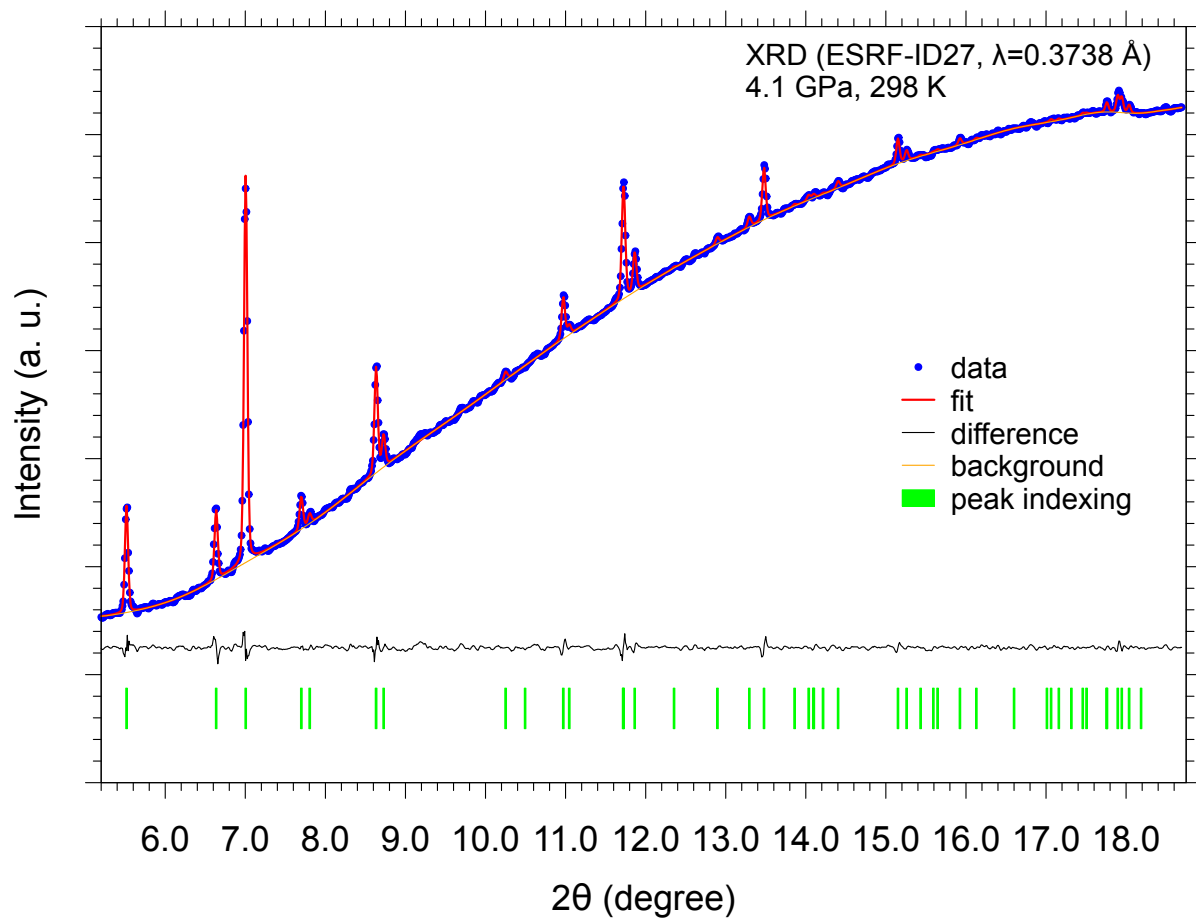

Supplementary Figure 2: Integrated panoramic XRD pattern (oscillation  $\phi=\pm 5^\circ$ , acquisition time 30 s) and Le Bail crystal lattice refinement using JANA 2006 software<sup>4</sup> of the sample after laser heating at 1.2-1.5 GPa ( $T \lesssim 1000 \text{ K}$ ) followed by room T compression at 4.1 GPa.

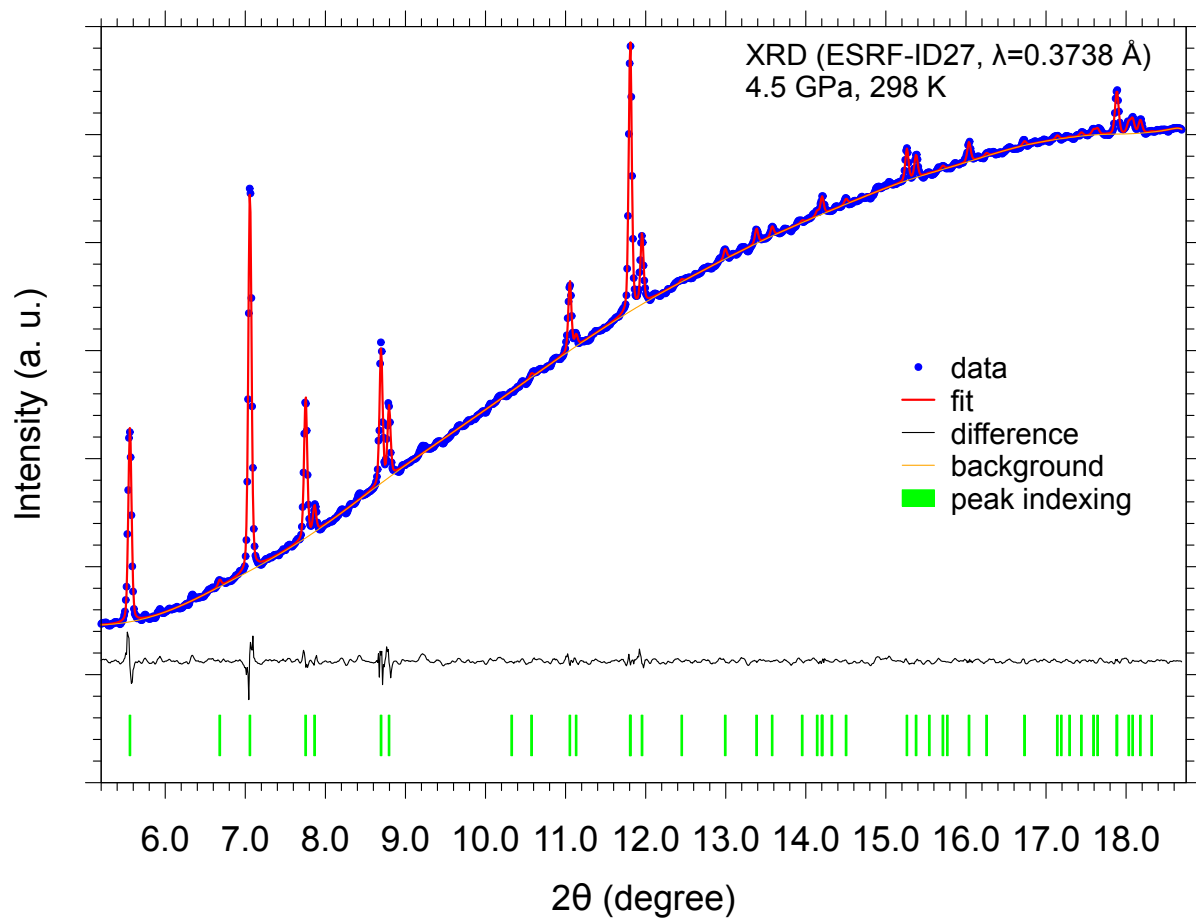

Supplementary Figure 3: Integrated panoramic XRD pattern (oscillation  $\phi=\pm 5^\circ$ , acquisition time 30 s) and Le Bail crystal lattice refinement using JANA 2006 software<sup>4</sup> of the sample after laser heating at 1.2-1.5 GPa ( $T \lesssim 1000 \text{ K}$ ) followed by room T compression at 4.5 GPa.

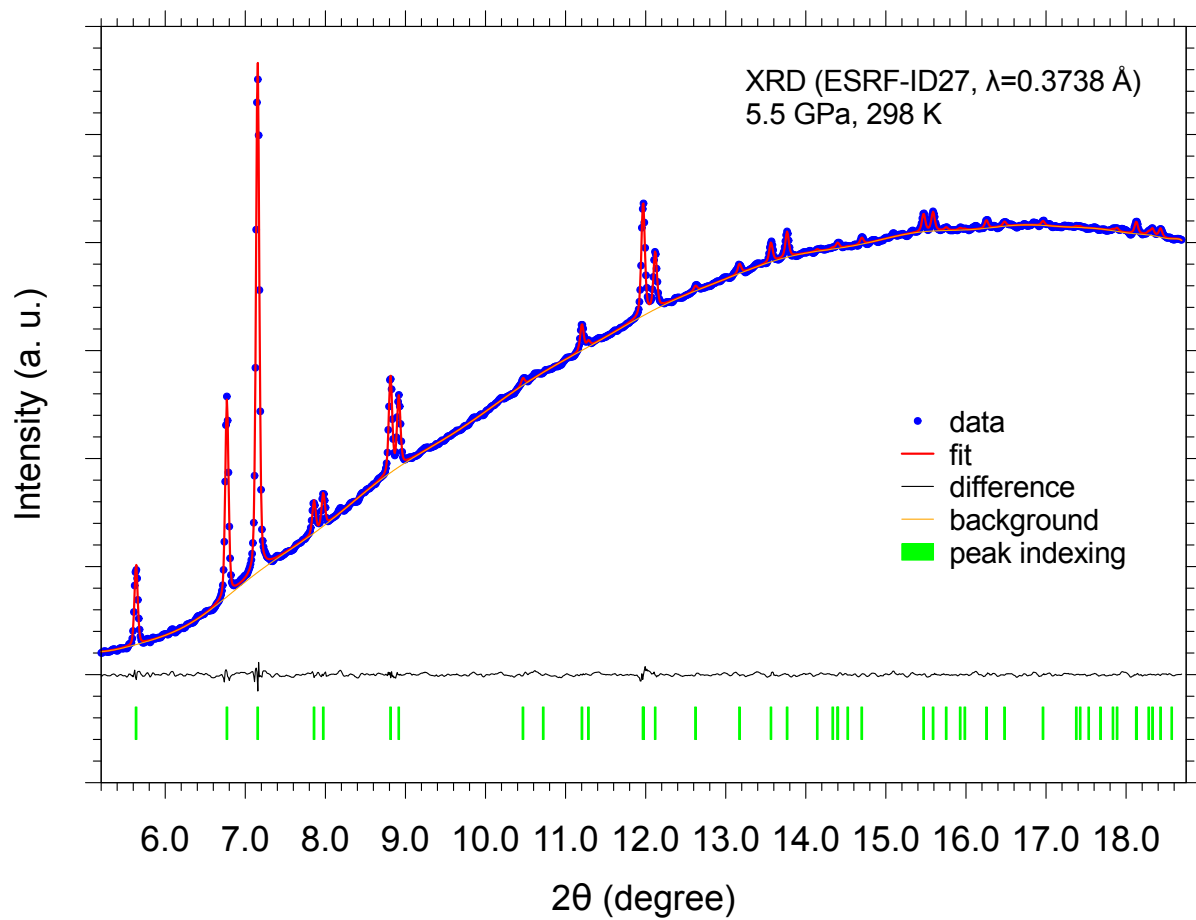

Supplementary Figure 4: Integrated panoramic XRD pattern (oscillation  $\phi=\pm 5^\circ$ , acquisition time 30 s) and Le Bail crystal lattice refinement using JANA 2006 software<sup>4</sup> of the sample after laser heating at 1.2-1.5 GPa ( $T \lesssim 1000 \text{ K}$ ) followed by room T compression at 5.5 GPa.

## Supplementary Note 2

**Phase diagram of PH<sub>3</sub>.** The solidification of PH<sub>3</sub> occurs at 140.65 K and the powder XRD data acquired at  $\sim$ -170 °C indicate that PH<sub>3</sub> crystallizes into a compact packing face centered cubic structure with four molecules in the unit cell ( $Z=4$ ), possibly belonging to space group  $T_h^2$  ( $Pn\bar{3}$ ,  $P2/n\bar{3}$ , n. 201) or  $O_h^4$  ( $Pn\bar{3}m$ ,  $P4_2/n\bar{3}2/m$ , n. 224) with lattice parameter  $a=6.31\pm 0.01$  Å, volume 251 Å<sup>3</sup> and density 0.896 g/cm<sup>3</sup>, for which a filling ratio of 0.74 can be calculated.<sup>5</sup>

No high pressure structural data are available. PH<sub>3</sub> is expected to crystallize at higher pressure compared to NH<sub>3</sub> (1.0 GPa, 300 K)<sup>6</sup> due to the absence of H-bonding,<sup>7-9</sup> as expected from the different electric dipole moment ( $\mu(\text{NH}_3)=1.47$  D,  $\mu(\text{PH}_3)=0.58$  D)<sup>10,11</sup> and as indicated by the corresponding boiling temperature ( $T_{\text{boil}}(\text{NH}_3)=-33.34$  °C,  $T_{\text{boil}}(\text{PH}_3)=-87.7$  °C).

In our experiment, we did not observe any crystallization process on compression before 3.5-4.1 GPa, that could be ascribed to the formation of a PH<sub>3</sub> crystal, nor any phase separation.

These occurrences suggest that PH<sub>3</sub> formed after LH is liquid and miscible with excess H<sub>2</sub>, forming a stable mixed liquid phase up to 3.5-4.1 GPa, where the (PH<sub>3</sub>)<sub>2</sub>H<sub>2</sub> vdW compound, which is evidently thermodynamically more stable than the PH<sub>3</sub> and H<sub>2</sub> components at these pressure and temperature conditions, crystallizes, similarly to what happens with the formation of the methane clathrate hydrate from liquid H<sub>2</sub>O and CH<sub>4</sub>.

Alternatively, PH<sub>3</sub> may give rise to an amorphous solid, which then reacts with liquid H<sub>2</sub> to form (PH<sub>3</sub>)<sub>2</sub>H<sub>2</sub>, or to an amorphous solid mixture with H<sub>2</sub>, which then crystallizes to form (PH<sub>3</sub>)<sub>2</sub>H<sub>2</sub>. In both cases no Bragg peaks are expected in the diffractogram before the crystallization of (PH<sub>3</sub>)<sub>2</sub>H<sub>2</sub>.



## Supplementary Note 3

**Fourier Transform InfraRed (FTIR) absorption spectroscopy.** Considering the frequency difference ( $\sim 120 \text{ cm}^{-1}$ ) between the  $\nu_2(A_1)$  and  $\nu_4(E)$  bending modes, the band at  $3346 \text{ cm}^{-1}$  could be assigned to the  $(\nu_1+\nu_2);(\nu_3+\nu_2)$  combination mode, in a similar way as the band at  $3466 \text{ cm}^{-1}$  was assigned to  $(\nu_1+\nu_4);(\nu_3+\nu_4)$ . Nevertheless the behavior of the  $3346 \text{ cm}^{-1}$  band on decompression proves this assignment to be incorrect. The frequency and intensity of the FTIR bands were obtained by fitting procedure using Voigt line shapes after baseline subtraction. Fityk software was used for this purpose.<sup>12</sup>

## Supplementary Note 4

**Raman spectroscopy.** The frequency and intensity of the Raman bands were obtained by fitting procedure using Voigt line shapes after baseline subtraction. Fityk software was used for this purpose.<sup>12</sup>

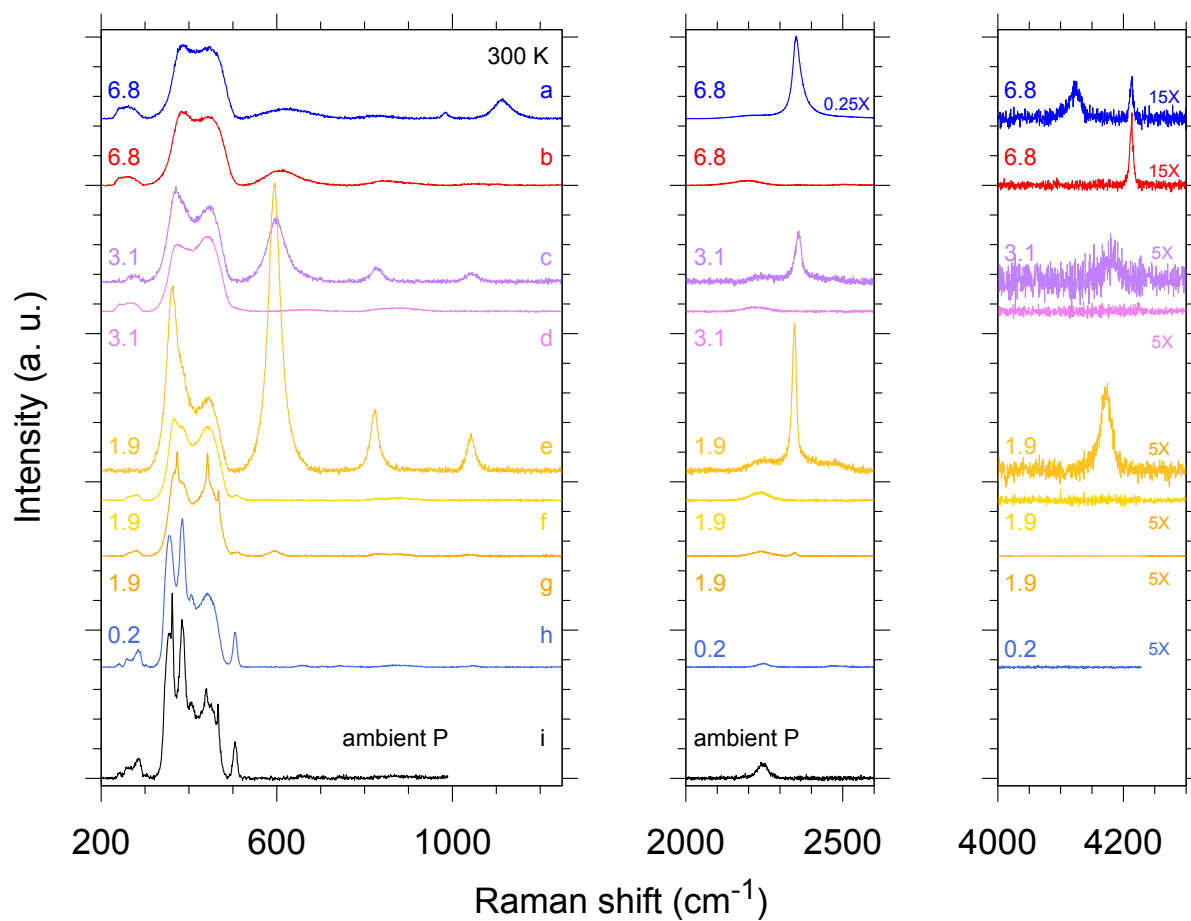

Supplementary Figure 5: Significant spectral regions of the Raman spectra acquired at 300 K after laser heating at different pressure points during decompression. Each spectrum was normalized to the band at  $\sim 450 \text{ cm}^{-1}$ . The labels of each spectrum indicate the corresponding pressure in GPa and the scaling factor for the intensity.

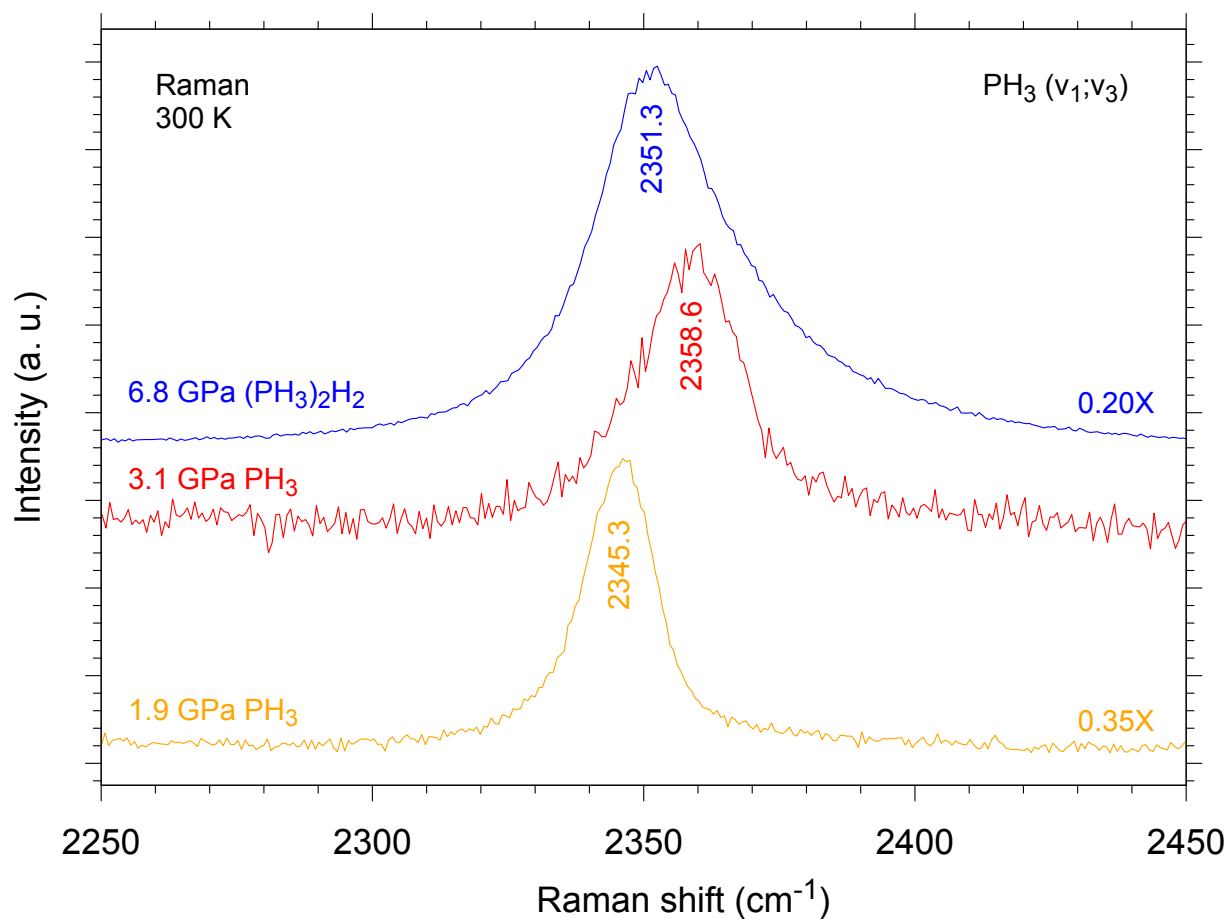

Supplementary Figure 6: Comparison among the Raman spectra of the sample in the  $\nu_1; \nu_3$  stretching region of  $\text{PH}_3$  at 6.8 GPa, 3.1 GPa and 1.9 GPa, illustrating the high frequency shift on releasing pressure from 6.8 GPa to 3.1 GPa across the melting pressure of  $(\text{PH}_3)_2\text{H}_2$ . The intensity of the spectra has been scaled, where indicated, and the spectra have been vertically translated for sake of clarity.

## Supplementary Note 5

Product of type-1 Raman spectrum.

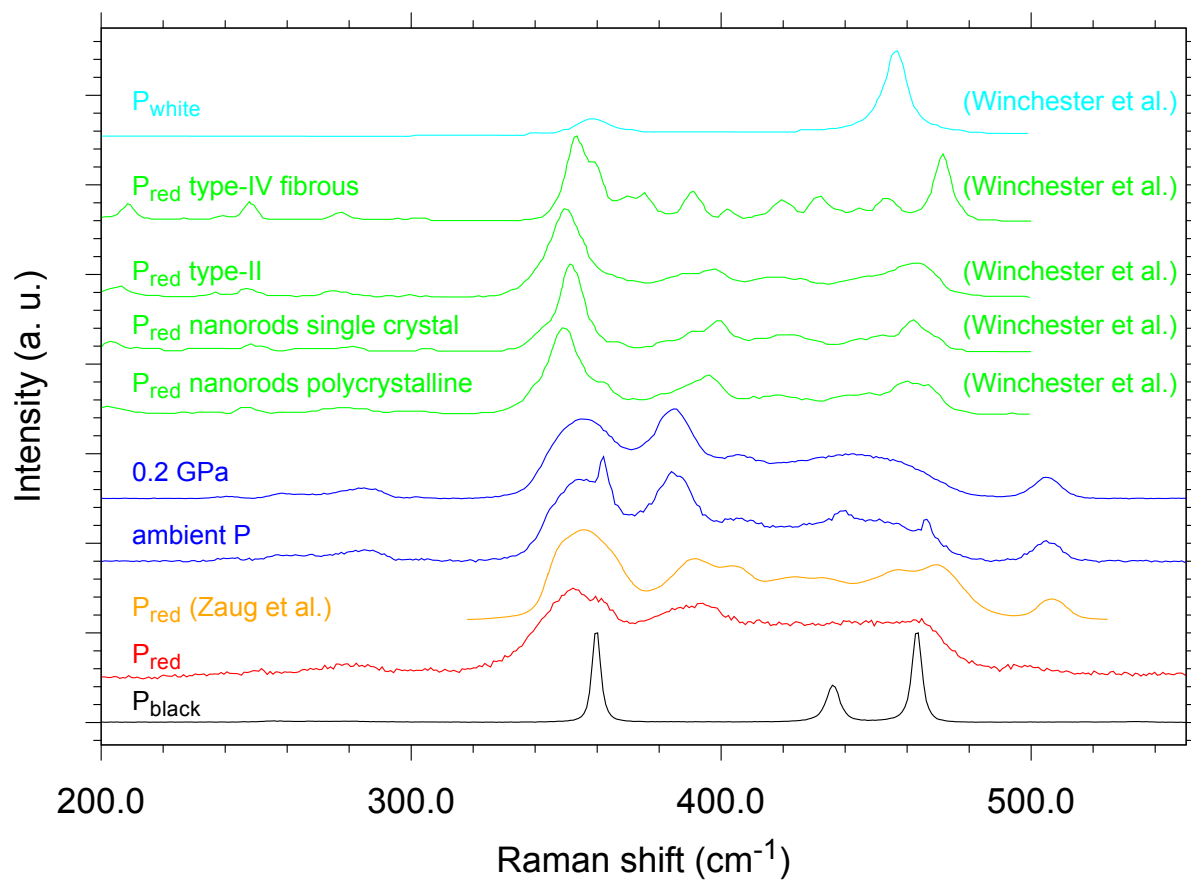

Supplementary Figure 7: Comparison among the Raman spectra of the recovered product at 0.2 GPa and at ambient conditions and those of  $P_{\text{black}}$ ,  $P_{\text{white}}$  and different types of  $P_{\text{red}}$  from literature<sup>13</sup> at ambient conditions.

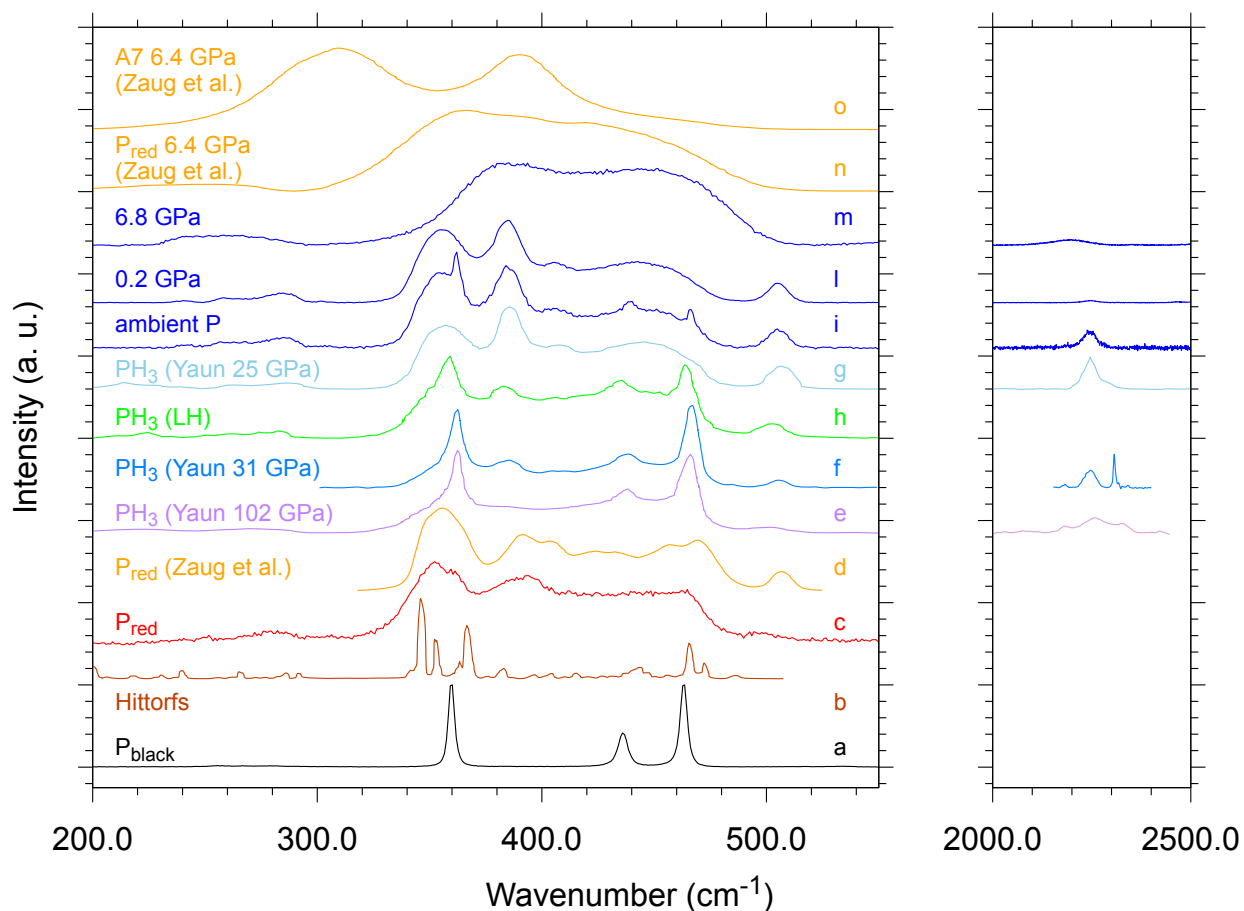

Supplementary Figure 8: Selected Raman spectral ranges showing a comparison among the Raman spectra of the sample acquired in this study at 6.8 GPa after laser heating (m), at 0.2 GPa after decompression (l) and at ambient pressure (i) and those of  $P_{\text{black}}$  (a, synthesized) and Hittorf's P (b, adapted from<sup>14</sup>) and amorphous  $P_{\text{red}}$  (c, from Aldrich) at ambient conditions. The Raman spectra of amorphous  $P_{\text{red}}$  from Zaug et al. at 6.4 GPa (n) and at ambient conditions (d) and of rhombohedral A7 phosphorus at 6.4 GPa (o) are also shown.<sup>15</sup> together with the spectra adapted from Yuan et al.<sup>16</sup> corresponding the recovered sample of  $\text{PH}_3$ , quenched from 25 GPa (g), 31 GPa (f), 102 GPa (e) and after laser heating (h).

## Supplementary Note 6

**Spectroscopic IR and Raman activity by group theory correlation diagrams.** From the structure solution of the single crystal XRD data, without information on the position of the H atoms, the  $I4cm$  ( $C_{4v}^{10}$ ) and  $I4/mcm$  ( $D_{4h}^{18}$ ) structures are essentially indistinguishable. Nevertheless, according to group theory symmetry considerations about the optical activity of the IR and Raman bands, assuming the  $I4/mcm$  structure in the case of  $(\text{PH}_3)_2\text{H}_2$  would imply the  $\text{PH}_3$  molecules, having  $C_{3v}$  point symmetry, to inconsistently occupy  $8h$  Wyckoff positions of  $C_{2v}$  site symmetry. Moreover, no IR active component would result from the occupation by  $\text{H}_2$  molecules of  $4a$  Wyckoff positions of  $D_4$  symmetry (Supplementary Figure 9).

On the other hand, according to the International Tables for Crystallography Volume A, the space group 108 ( $I4cm$ ,  $C_{4v}^{10}$ ) features  $C_4(4a)$ ,  $C_{2v}(4b)$ ,  $C_s(8c)$ , and  $C_1(16d)$  crystal sites, with the values in parentheses indicating the Wyckoff positions and the corresponding site multiplicity.<sup>17,18</sup> The structure solution of the XRD pattern of our crystalline product indicates a  $I4cm$  structure, in which the  $\text{PH}_3$  molecules occupy the  $C_s$  ( $8c$ ) sites, consistently with the molecular  $C_{3v}$  point symmetry (Supplementary Figure 10).

As the  $\text{H}_2$  molecules are concerned, according to group theory, only the occupation of the  $C_4$  ( $4a$ ) sites gives rise to one IR and Raman active component in the Davydov crystal field splitting for the H-H stretching vibration (Supplementary Figure 10). The occupation of the other sites by  $\text{H}_2$  molecules would indeed activate more components than the single extra band observed in the  $\text{H}_2$  stretching region of both IR and Raman spectra and can thus be confidently excluded.

In particular, the occupation of the  $C_{2v}$  ( $4b$ ) sites would produce one IR and Raman active component ( $A_1$ ) and one Raman active component ( $B_1$ ) (Supplementary Figure 11).

The occupation of  $C_s$  ( $8c$ ) sites would produce two IR and Raman active ( $A_1$  and  $E$ ) components and one  $B_1$  Raman active component (Supplementary Figure 12).

Finally, the occupation of the  $C_1$  ( $16d$ ) sites would produce three IR and Raman active

components (1  $A_1$ , 2  $E$ ) and two Raman active components (1  $B_1$  and 1  $B_2$ ) (Supplementary Figure 13).

One may speculate and argue that the experimental observation of the single additional component expected for the occupation of the  $C_{2v}$  sites with respect to the  $C_4$  ones was somehow missed. Nevertheless, even if this would be the case, the occupation of  $C_{2v}$  rather than  $C_4$  sites by  $H_2$  molecules, would correspond to the same  $(PH_3)_2H_2$  stoichiometry of the vdW compound, as the multiplicity of  $C_{2v}$  and  $C_4$  sites is the same.

The crystal structure belonging to the  $I4cm$  space group, where the  $PH_3$  molecules occupy 8  $c$  Wyckoff positions of  $C_s$  site symmetry and the  $H_2$  molecules occupy 4  $a$  Wyckoff positions of  $C_4$  site symmetry, with a resulting  $(PH_3)_2H_2$  stoichiometry determined by the full occupancy of the site multiplicity, fully and consistently accounts for all the issues related to the existence of free volume, in the case  $PH_3$  would be present, and to the optical activity of the extra component appearing in the IR and Raman spectra of the crystalline vdW compound.

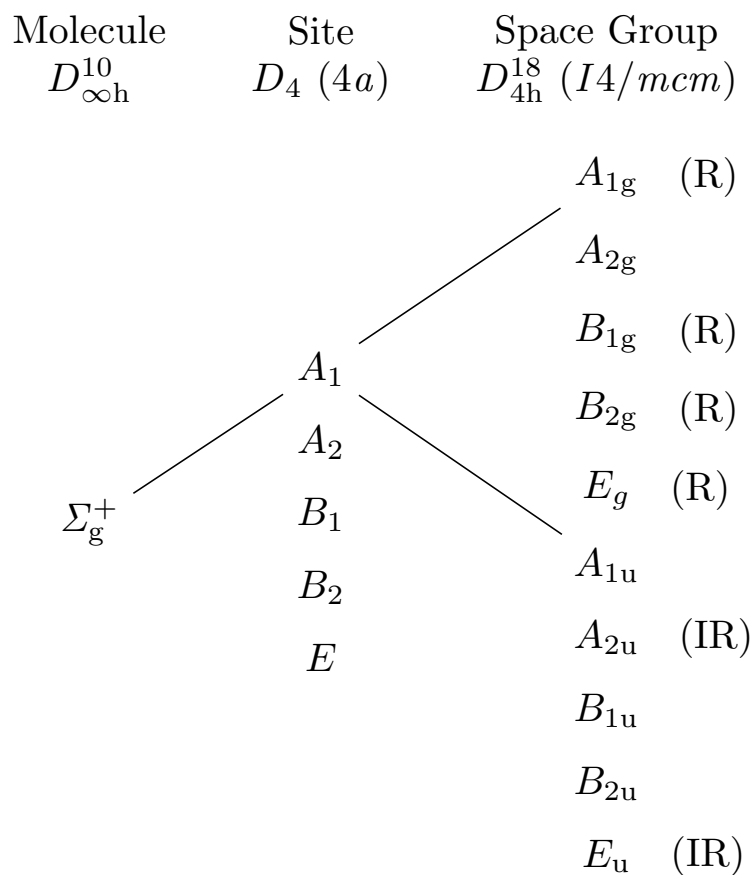

Supplementary Figure 9: Correlation diagram between the irreducible representations of the normal modes of vibrations of  $H_2$  in the point symmetry group ( $D_{\infty h}$ ) of the isolated molecule (left side) and in the  $I4/mcm$  ( $D_{4h}^{18}$ ) space group of the  $(PH_3)_2H_2$  crystal structure (right side), through the corresponding site symmetry (center). The infrared (IR) and Raman (R) optical activity of the symmetry species are also reported. In this case only one Raman active component should be observed, in contrast with the single IR and Raman active extra band appearing in our spectra in the  $H_2$  stretching region.



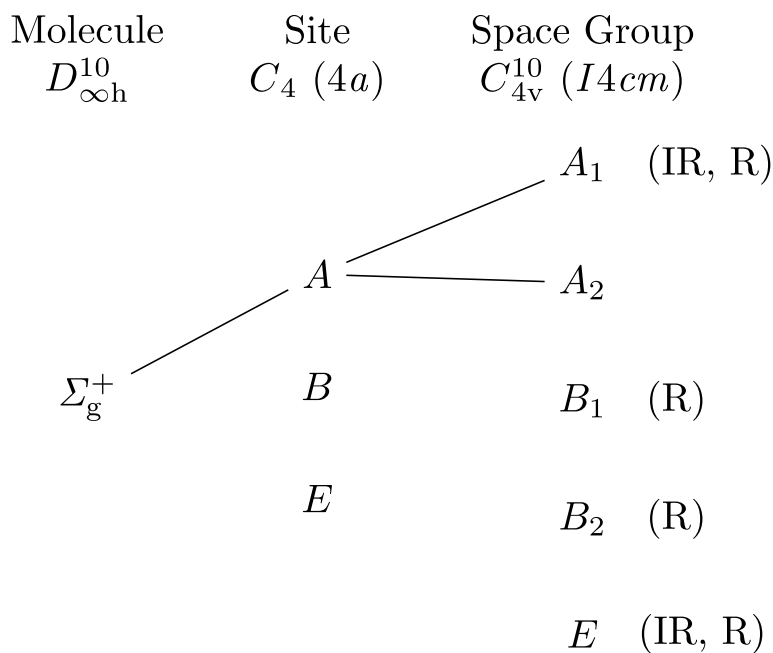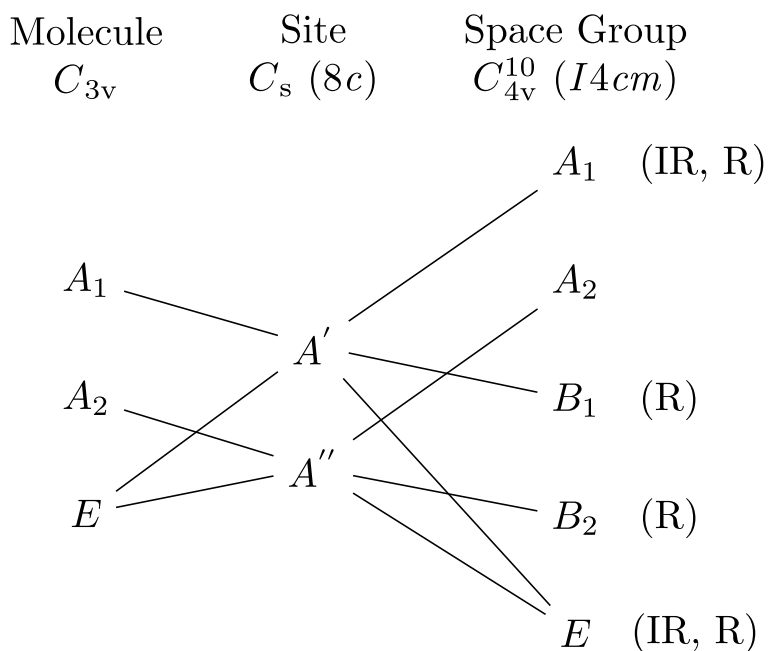

Supplementary Figure 10: Correlation diagrams between the irreducible representations of the normal modes of vibrations of  $H_2$  (upper panel) and  $PH_3$  (lower panel) in the point symmetry group of the isolated molecule (left side) and in the  $I4cm$  ( $C_{4v}^{10}$ ) space group of the  $(PH_3)_2H_2$  crystal structure (right side), through the corresponding site symmetry and Wyckoff position (center). The infrared (IR) and Raman (R) optical activity of the symmetry species are also reported. One IR and Raman active component is expected for the H-H stretching vibration, as indeed observed in our IR and Raman spectra in the  $H_2$  stretching region, thus supporting the presence of  $H_2$  molecules on  $C_4$  sites.

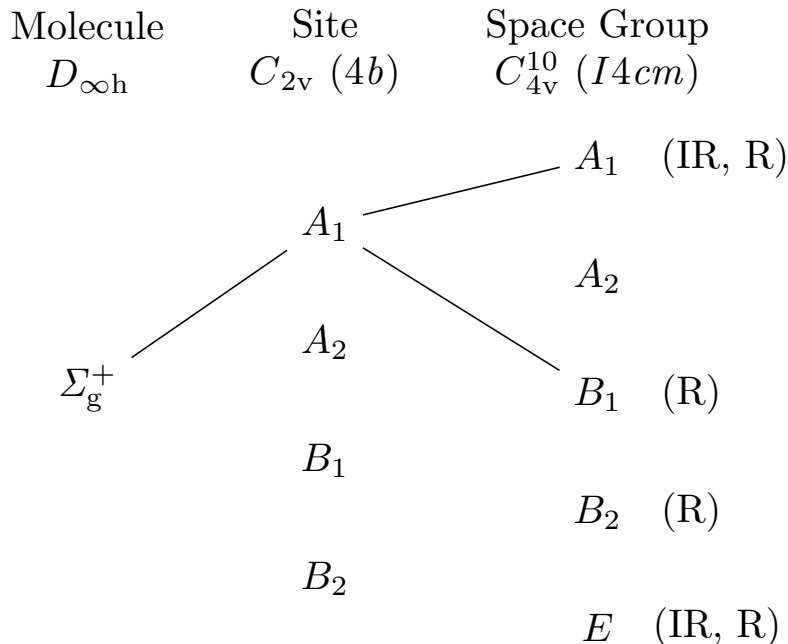

Supplementary Figure 11: Correlation diagram between the irreducible representations of the normal modes of vibrations of  $\text{H}_2$  in the point symmetry group ( $D_{\infty h}$ ) of the isolated molecule (left side) and in the  $I4cm$  ( $C_{4v}^{10}$ ) space group of the  $(\text{PH}_3)_2\text{H}_2$  crystal structure (right side), through the hypothetical site with symmetry  $C_{2v}$  corresponding to  $4b$  Wyckoff positions (center). The infrared (IR) and Raman (R) optical activity of the symmetry species are also reported. In this case, one IR and Raman active component ( $A_1$ ) and one Raman active component ( $B_1$ ), should be observed. The absence of the last one in our Raman spectra, supports the presence of  $\text{H}_2$  molecules on the  $C_4$  sites rather than on the  $C_{2v}$  ones.

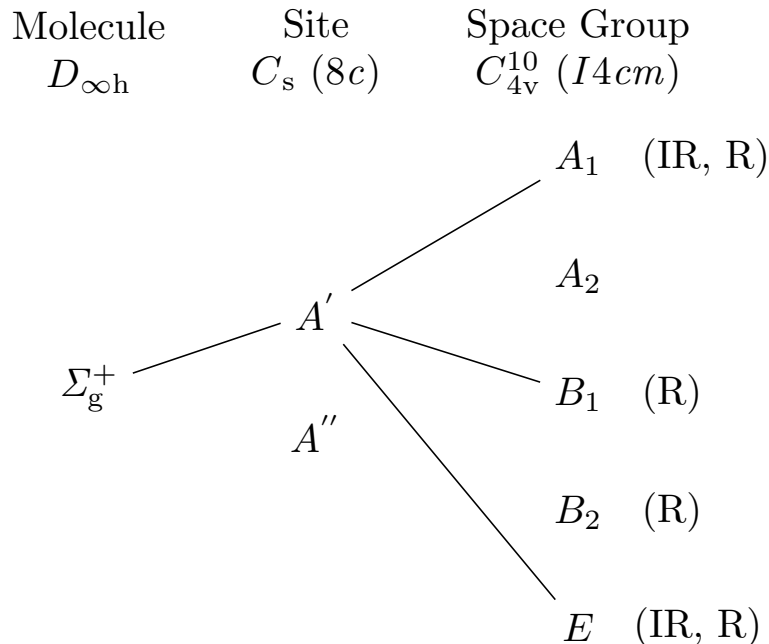

Supplementary Figure 12: Correlation diagram between the irreducible representations of the normal modes of vibrations of  $H_2$  in the point symmetry group ( $D_{\infty h}$ ) of the isolated molecule (left side) and in the  $I4cm$  ( $C_{4v}^{10}$ ) space group of the  $(PH_3)_2H_2$  crystal structure (right side), through the hypothetical site with symmetry  $C_s$  corresponding to  $8c$  Wyckoff positions (center). The infrared (IR) and Raman (R) optical activity of the symmetry species are also reported. In this case two IR and Raman active components (1  $A_1$ , 1  $E$ ) and one Raman active components (1  $B_1$ ) should be observed, in contrast with the single IR and Raman active extra band appearing in our spectra in the  $H_2$  stretching region, thus excluding the possibility of the  $H_2$  molecules being located on the  $C_s$  sites.

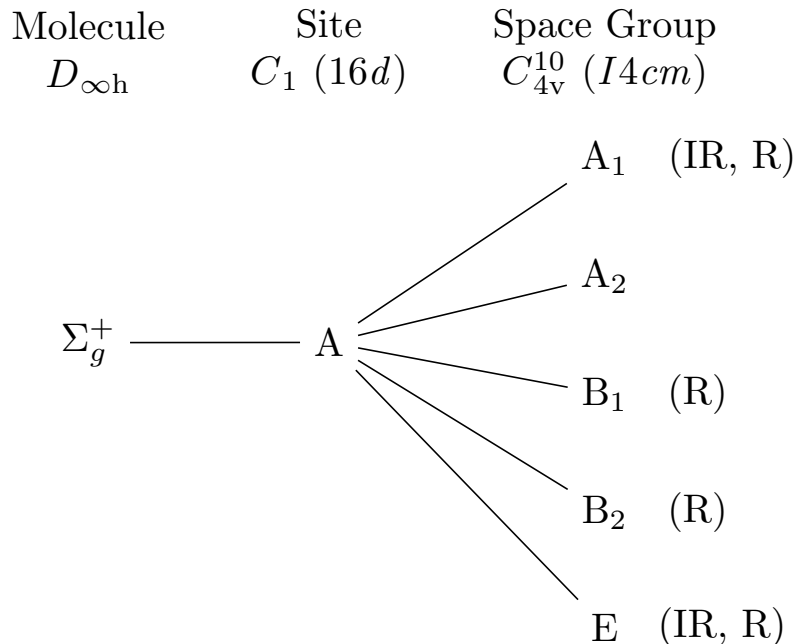

Supplementary Figure 13: Correlation diagram between the irreducible representations of the normal modes of vibrations of  $H_2$  in the point symmetry group ( $D_{\infty h}$ ) of the isolated molecule (left side) and in the  $I4cm$  ( $C_{4v}^{10}$ ) space group of the  $(PH_3)_2H_2$  crystal structure (right side), through the hypothetical site with symmetry  $C_1$  corresponding to  $16d$  Wyckoff positions (center). The infrared (IR) and Raman (R) optical activity of the symmetry species are also reported. In this case three IR and Raman active components (1  $A_1$ , 2  $E$ ) and two Raman active components (1  $B_1$  and 1  $B_2$ ) should be observed, in contrast to the single IR and Raman active extra band appearing in our spectra in the  $H_2$  stretching region, thus excluding the possibility of the  $H_2$  molecules being located on the  $C_1$  sites.

## Supplementary Note 7

**Equation of state of  $(\text{PH}_3)_2\text{H}_2$ .** Three XRD diffraction patterns of  $(\text{PH}_3)_2\text{H}_2$  were collected, respectively at 4.1, 4.5 and 5.5 GPa after the crystallization of the reaction product. The structural data obtained from their refinement are reported in Supplementary Table 4.

The density values, calculated from the refined unit cell volume obtained using JANA 2006 software for Le Bail fit of the panoramic XRD pattern,<sup>4</sup> are: 1.166 g cm<sup>-3</sup> at 4.1 GPa, 1.220 g cm<sup>-3</sup> at 4.5 GPa and 1.271 g cm<sup>-3</sup> at 5.5 GPa.

Supplementary Table 4: Unit cell parameters and volume of  $(\text{PH}_3)_2\text{H}_2$  at different pressures.

| P (GPa) | <i>a</i> (Å) | <i>b</i> (Å) | <i>c</i> (Å) | $\alpha$ (degree) | $\beta$ (degree) | $\gamma$ (degree) | Volume (Å <sup>3</sup> ) |
|---------|--------------|--------------|--------------|-------------------|------------------|-------------------|--------------------------|
| 4.1     | 7.76788(16)  | 7.76788(16)  | 6.4584(2)    | 90                | 90               | 90                | 389.698(12)              |
| 4.5     | 7.70793(18)  | 7.70793(18)  | 6.4154(2)    | 90                | 90               | 90                | 381.137(9)               |
| 5.5     | 7.60348(8)   | 7.60348(8)   | 6.3305(1)    | 90                | 90               | 90                | 365.983(5)               |

The equation of state of  $(\text{PH}_3)_2\text{H}_2$  in the 4.1-5.5 GPa pressure range, obtained by fitting of the pressure data point as a function of the volume using a 2nd order Birch-Murnaghan relation<sup>19</sup>

$$p(V) = \frac{3B}{2} \left[ \left( \frac{V_0}{V} \right)^{\frac{7}{2}} - \left( \frac{V_0}{V} \right)^{\frac{5}{2}} \right] \quad (1)$$

indicates a bulk modulus  $B=6.7(0.8)$  GPa and volume  $V_0=536(14)$  Å<sup>3</sup> (Supplementary Figure 14).

The isothermal bulk modulus of  $(\text{PH}_3)_2\text{H}_2$  is therefore comparable to that of other Al<sub>2</sub>Cu alloy-type *p*-block element hydride-hydrogen phases (e.g. for  $(\text{H}_2\text{S})_2\text{H}_2$  it is 7.2 GPa<sup>20</sup>), but an order of magnitude higher than the bulk modulus of the phase I of H<sub>2</sub>.<sup>21</sup>

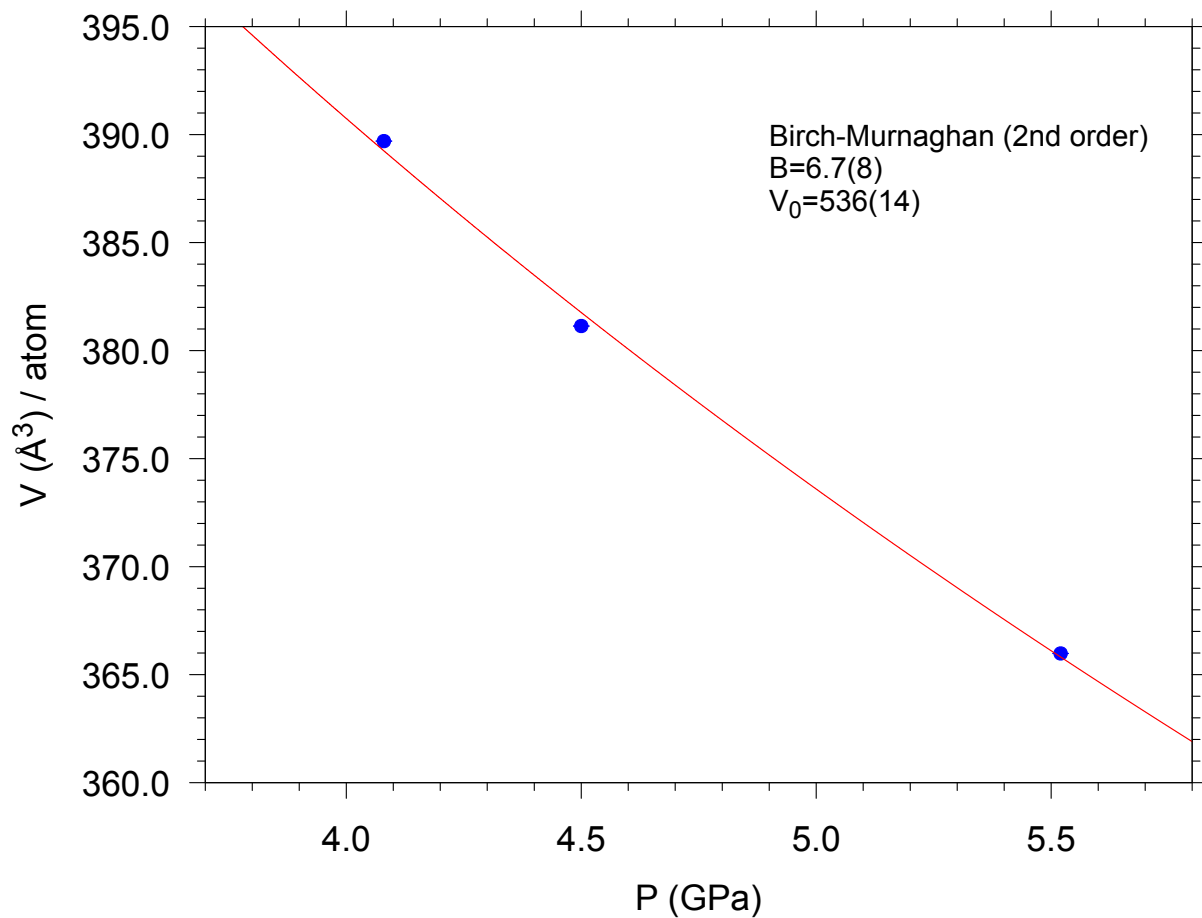

Supplementary Figure 14: Volume data points of  $(\text{PH}_3)_2\text{H}_2$  at 4.1, 4.5 and 5.5 GPa (blue circles) and corresponding equation of state in the 4-6 GPa pressure range obtained by their fit using a 2nd order Birch-Murnaghan relation, with  $B=6.7\pm 0.8$  GPa and  $V_0=536\pm 14$  Å<sup>3</sup>. The errors on the volume data points are of comparable size with the diameter of the blue solid circles.

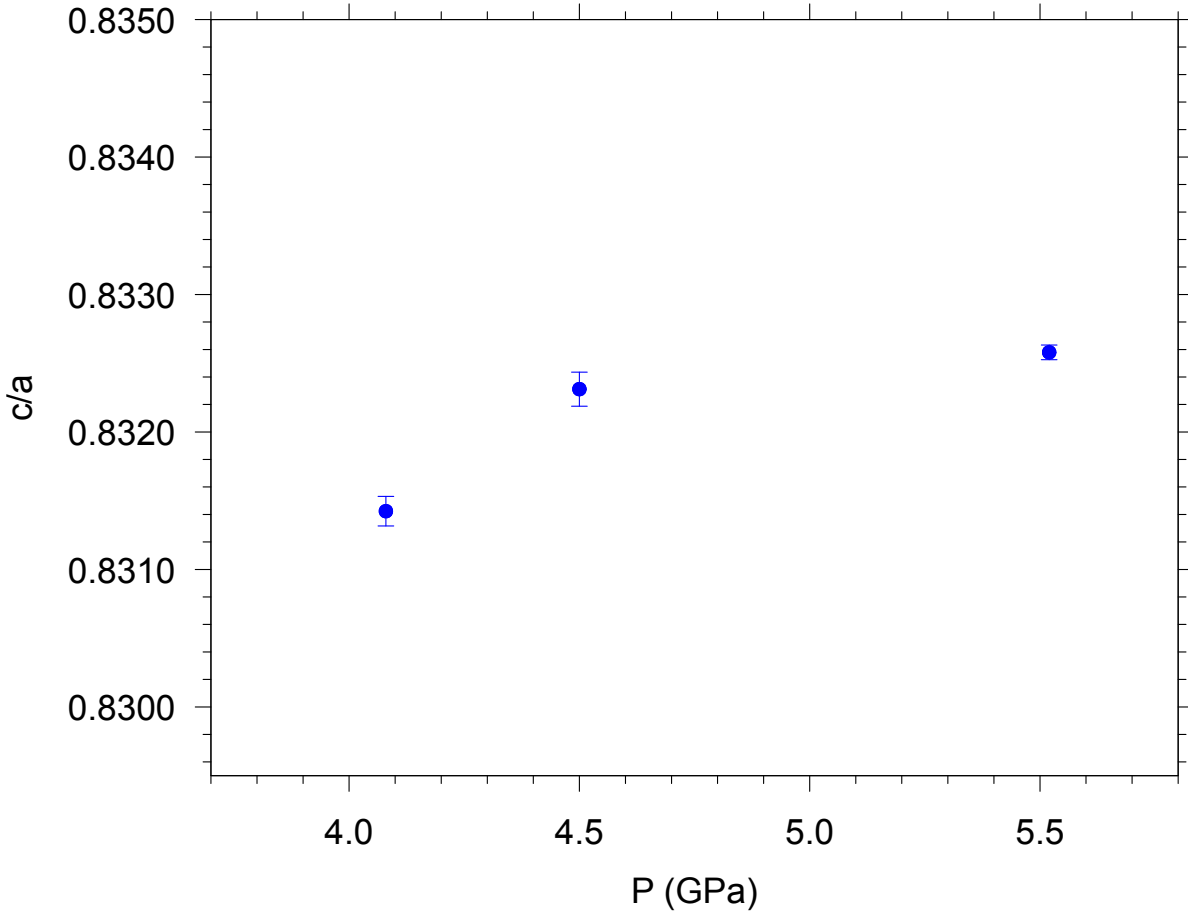

Supplementary Figure 15: Pressure evolution of the  $c/a$  axial ratio, indicating the almost isotropic compression within the applied pressure range.

The obtained lattice parameters allowed to conclude that the variation with pressure of the  $c/a$  ratio is nearly constant, indicating an almost isotropic compression within the applied pressure range (Supplementary Figure 15).

## Supplementary Note 8

H<sub>2</sub>-containing compounds of non-metallic elements.

|                       |                       |                       |                       |                      |                     |                   |
|-----------------------|-----------------------|-----------------------|-----------------------|----------------------|---------------------|-------------------|
|                       |                       |                       |                       |                      |                     | 18                |
|                       |                       |                       |                       |                      |                     | 2<br>He<br>Helium |
| 5<br>B<br>Boron       | 6<br>C<br>Carbon      | 7<br>N<br>Nitrogen    | 8<br>O<br>Oxygen      | 9<br>F<br>Fluorine   | 10<br>Ne<br>Neon    |                   |
| 13<br>Al<br>Aluminium | 14<br>Si<br>Silicon   | 15<br>P<br>Phosphorus | 16<br>S<br>Sulphur    | 17<br>Cl<br>Chlorine | 18<br>Ar<br>Argon   |                   |
| 31<br>Ga<br>Gallium   | 32<br>Ge<br>Germanium | 33<br>As<br>Arsenic   | 34<br>Se<br>Selenium  | 35<br>Br<br>Bromine  | 36<br>Kr<br>Krypton |                   |
| 49<br>In<br>Indium    | 50<br>Sn<br>Tin       | 51<br>Sb<br>Antimony  | 52<br>Te<br>Tellurium | 53<br>I<br>Iodine    | 54<br>Xe<br>Xenon   |                   |
| 81<br>Tl<br>Thallium  | 82<br>Pb<br>Lead      | 83<br>Bi<br>Bismuth   | 84<br>Po<br>Polonium  | 85<br>At<br>Astatine | 86<br>Rn<br>Radon   |                   |

Supplementary Figure 16: Section of the Periodic Table of the Elements showing the experimentally reported non-metal elements able to form H<sub>2</sub>-containing van der Waals hydrides, including noble gases, simple diatomics and molecular hydrides (green): CH<sub>4</sub>(H<sub>2</sub>)<sub>4</sub>, CH<sub>4</sub>H<sub>2</sub>, (CH<sub>4</sub>)<sub>2</sub>H<sub>2</sub>,<sup>22</sup> SiH<sub>4</sub>(H<sub>2</sub>)<sub>2</sub>,<sup>23</sup> GeH<sub>4</sub>(H<sub>2</sub>)<sub>2</sub>,<sup>24</sup> N<sub>2</sub>(H<sub>2</sub>)<sub>2</sub>,<sup>25</sup> (N<sub>2</sub>)<sub>6</sub>(H<sub>2</sub>)<sub>7</sub>,<sup>25,26</sup> (O<sub>2</sub>)<sub>3</sub>(H<sub>2</sub>)<sub>4</sub>,<sup>27</sup> (H<sub>2</sub>O)<sub>6</sub>H<sub>2</sub>,<sup>28</sup> (H<sub>2</sub>O)H<sub>2</sub>,<sup>28</sup> (H<sub>2</sub>S)<sub>2</sub>H<sub>2</sub>,<sup>20</sup> (H<sub>2</sub>Se)<sub>2</sub>H<sub>2</sub>,<sup>29</sup> (HI)<sub>2</sub>H<sub>2</sub>,<sup>30</sup> Ar(H<sub>2</sub>)<sub>2</sub>,<sup>31</sup> Kr(H<sub>2</sub>)<sub>2</sub>,<sup>32</sup> Xe(H<sub>2</sub>)<sub>8</sub>.<sup>33,34</sup>



|    |                 |                       |                       |                       |                      |                     |
|----|-----------------|-----------------------|-----------------------|-----------------------|----------------------|---------------------|
|    |                 |                       |                       |                       |                      | 18                  |
|    |                 |                       |                       |                       |                      | 2<br>He<br>Helium   |
|    | 13              | 14                    | 15                    | 16                    | 17                   |                     |
| 5  | B<br>Boron      | 6<br>C<br>Carbon      | 7<br>N<br>Nitrogen    | 8<br>O<br>Oxygen      | 9<br>F<br>Fluorine   | 10<br>Ne<br>Neon    |
| 13 | Al<br>Aluminium | 14<br>Si<br>Silicon   | 15<br>P<br>Phosphorus | 16<br>S<br>Sulphur    | 17<br>Cl<br>Chlorine | 18<br>Ar<br>Argon   |
| 31 | Ga<br>Gallium   | 32<br>Ge<br>Germanium | 33<br>As<br>Arsenic   | 34<br>Se<br>Selenium  | 35<br>Br<br>Bromine  | 36<br>Kr<br>Krypton |
| 49 | In<br>Indium    | 50<br>Sn<br>Tin       | 51<br>Sb<br>Antimony  | 52<br>Te<br>Tellurium | 53<br>I<br>Iodine    | 54<br>Xe<br>Xenon   |
| 81 | Tl<br>Thallium  | 82<br>Pb<br>Lead      | 83<br>Bi<br>Bismuth   | 84<br>Po<br>Polonium  | 85<br>At<br>Astatine | 86<br>Rn<br>Radon   |

Supplementary Figure 17: Section of the Periodic Table of the Elements showing the experimentally reported non-metal elements able to form H<sub>2</sub>-containing van der Waals compounds of the corresponding molecular hydrides (purple): CH<sub>4</sub>(H<sub>2</sub>)<sub>4</sub>, CH<sub>4</sub>H<sub>2</sub>, (CH<sub>4</sub>)<sub>2</sub>H<sub>2</sub>,<sup>22</sup> SiH<sub>4</sub>(H<sub>2</sub>)<sub>2</sub>,<sup>23</sup> GeH<sub>4</sub>(H<sub>2</sub>)<sub>2</sub>,<sup>24</sup> (H<sub>2</sub>O)<sub>6</sub>H<sub>2</sub>,<sup>28</sup> (H<sub>2</sub>O)<sub>2</sub>H<sub>2</sub>,<sup>28</sup> (H<sub>2</sub>S)<sub>2</sub>H<sub>2</sub>,<sup>20</sup> (H<sub>2</sub>Se)<sub>2</sub>H<sub>2</sub>,<sup>29</sup> (HI)<sub>2</sub>H<sub>2</sub>.<sup>30</sup>

18

|                 |                 |                 |                 |                |               |
|-----------------|-----------------|-----------------|-----------------|----------------|---------------|
|                 |                 |                 |                 |                | 2             |
|                 |                 |                 |                 |                | He<br>Helium  |
| 13              | 14              | 15              | 16              | 17             |               |
| 5               | 6               | 7               | 8               | 9              | 10            |
| B<br>Boron      | C<br>Carbon     | N<br>Nitrogen   | O<br>Oxygen     | F<br>Fluorine  | Ne<br>Neon    |
| 13              | 14              | 15              | 16              | 17             | 18            |
| Al<br>Aluminium | Si<br>Silicon   | P<br>Phosphorus | S<br>Sulphur    | Cl<br>Chlorine | Ar<br>Argon   |
| 31              | 32              | 33              | 34              | 35             | 36            |
| Ga<br>Gallium   | Ge<br>Germanium | As<br>Arsenic   | Se<br>Selenium  | Br<br>Bromine  | Kr<br>Krypton |
| 49              | 50              | 51              | 52              | 53             | 54            |
| In<br>Indium    | Sn<br>Tin       | Sb<br>Antimony  | Te<br>Tellurium | I<br>Iodine    | Xe<br>Xenon   |
| 81              | 82              | 83              | 84              | 85             | 86            |
| Tl<br>Thallium  | Pb<br>Lead      | Bi<br>Bismuth   | Po<br>Polonium  | At<br>Astatine | Rn<br>Radon   |

Supplementary Figure 18: Section of the Periodic Table of the Elements showing the experimentally reported non-metal elements able to form H<sub>2</sub>-containing van der Waals compounds of the corresponding molecular hydrides with X<sub>2</sub>H<sub>2</sub> composition (yellow) and *I4cm* (*I4/mcm*) structure: (CH<sub>4</sub>)<sub>2</sub>H<sub>2</sub>,<sup>22</sup> (H<sub>2</sub>S)<sub>2</sub>H<sub>2</sub>,<sup>20</sup> (H<sub>2</sub>Se)<sub>2</sub>H<sub>2</sub>,<sup>29</sup> (HI)<sub>2</sub>H<sub>2</sub>.<sup>30</sup>

## Supplementary Note 9

**The Haber-Bosch - like reaction for PH<sub>3</sub>.** As in the case of the Haber-Bosch process for the synthesis of NH<sub>3</sub> from N<sub>2</sub> and H<sub>2</sub>,<sup>35,36</sup>

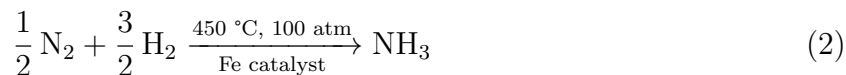

the formation of PH<sub>3</sub> from P<sub>black</sub> and H<sub>2</sub> reported in this study,

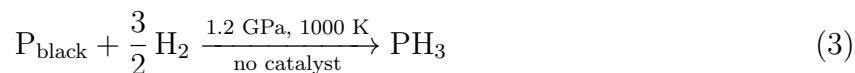

occurs under high pressure and high temperature conditions. In both cases, according to the Le Chatelier's principle, pressure shifts the reaction towards the formation of the reaction products with a reduced number of moles, while temperature likely allows to overcome kinetic barriers. Indeed no reactivity between P<sub>black</sub> and H<sub>2</sub> was observed at high pressure before laser heating during the experimental time window. Within this pictures the formation of PH<sub>3</sub> from P and H<sub>2</sub> represents the analogue hydrogenation reaction of N<sub>2</sub>, involving in this case the stable allotrope of the heavier pnictogen P, thus establishing a connection between the high pressure reactivity of the two group 15 elements and once again demonstrating the ability of pressure in enhancing the similarities in the properties of elements belonging to the same group and apparently exhibiting different behavior at ambient pressure. Going beyond this assertion is honestly not possible for several reasons, essentially related to the lack of thermochemical data about PH<sub>3</sub> and P<sub>black</sub> at high pressure. Nevertheless, some important differences, worth to be noted, apply.

First, at standard conditions (0.1 MPa and 298.15 K), whereas the formation of NH<sub>3</sub> from N<sub>2</sub> and H<sub>2</sub> is exothermic ( $\Delta_f H^\circ_{\text{NH}_3(g)} = -46.11 \text{ kJ mol}^{-1}$ ) and exoergonic ( $\Delta_f G^\circ_{\text{NH}_3(g)} =$

-16.45 kJ mol<sup>-1</sup>), and thus thermodynamically favorable, the formation of gaseous PH<sub>3</sub> from solid P and H<sub>2</sub> is endothermic and endoergonic, thus thermodynamically unfavorable, either when starting from P<sub>white</sub> ( $\Delta_f H^\circ_{PH_3(g)}=5.49$  kJ mol<sup>-1</sup>,  $\Delta_f G^\circ_{PH_3(g)}=13.4$  kJ mol<sup>-1</sup>), which is made of molecular P<sub>4</sub> units, or, even more, when starting from P<sub>black</sub> ( $\Delta_f H^\circ_{PH_3(g)}=18.341$  kJ mol<sup>-1</sup>,  $\Delta_f G^\circ_{PH_3(g)}=20.8517$  kJ mol<sup>-1</sup>), which has a crystalline layered structure, made by the stacking of phopshorene layers with strong intra-layer covalent bonds (Supplementary Table 5). Considering the experimental observation of PH<sub>3</sub> from the high pressure and high temperature reaction of P<sub>black</sub> and H<sub>2</sub> reported in this study, the positive value of the Gibbs energy at standard conditions suggests an even more important role of pressure in the formation of PH<sub>3</sub> than in the formation of NH<sub>3</sub>.

Second, the Haber-Bosch process is a gas phase reaction, and all the thermodynamic considerations about enthalpy, entropy and Gibbs energy rely on this state of matter, whereas the reaction leading to the formation of PH<sub>3</sub> observed in our study occurs in condensed phase. As  $\Delta_f H^\circ_{NH_3} = \Delta_r H^\circ_{NH_3} = -46.11$  kJ mol<sup>-1</sup> and  $\Delta_r S^\circ_{NH_3} = S^\circ_{NH_3} - \frac{1}{2}S^\circ_{N_2} - \frac{3}{2}S^\circ_{H_2} = -99.4$  J mol<sup>-1</sup>, the formation of NH<sub>3</sub> from N<sub>2</sub> and H<sub>2</sub> remains spontaneous up to 463.9 K, when  $\Delta_r G^\circ_{NH_3} = \Delta_r H^\circ_{NH_3} - T\Delta_r S^\circ_{NH_3} = 0$ . Nevertheless, even if the reaction is thermodynamically spontaneous at ambient conditions, the kinetic barrier to break the strong N<sub>2</sub> triple bond prevents the practical occurrence of the reaction. To overcome this issue, in the Haber-Bosch process high pressure is used for shifting the equilibrium towards the reactants according to

Supplementary Table 5: Thermodynamic data at 0.1 MPa and 298 K taken from<sup>36</sup> (\* from ref<sup>37</sup>). Note that, despite P<sub>black</sub> being the thermodynamically stable allotrope of P, the reference state for P in current use is P<sub>white</sub>.<sup>37</sup>

|                     | $\Delta_f H^\circ$ (kJ mol <sup>-1</sup> ) | $\Delta_f G^\circ$ (kJ mol <sup>-1</sup> ) | $S^\circ$ (J K <sup>-1</sup> mol <sup>-1</sup> ) |
|---------------------|--------------------------------------------|--------------------------------------------|--------------------------------------------------|
| H <sub>2</sub> (g)  | 0                                          | 0                                          | 130.684                                          |
| N <sub>2</sub> (g)  | 0                                          | 0                                          | 191.61                                           |
| NH <sub>3</sub> (g) | -46.11                                     | -16.45                                     | 192.45                                           |
| PH <sub>3</sub> (g) | +5.49                                      | +13.4                                      | 210.243                                          |
| P (s, white)        | 0                                          | 0                                          | 41.09                                            |
| P (s, black)*       | -12.851                                    | -7.338                                     | 22.586                                           |

the Le Chatelier's principle, while high temperature and catalysts are used to overcome the kinetic barrier. The combination of pressure and catalysts allows to optimize the temperature to be at the same time sufficiently high for speeding up the reaction while not making it unfavorable.

Supplementary Table 6: Thermodynamic data available for liquid (l) H<sub>2</sub>,<sup>38</sup> N<sub>2</sub><sup>39</sup> and NH<sub>3</sub><sup>40</sup> at 5000 bar and 300 K and for liquid PH<sub>3</sub> at standard conditions (0.1 MPa, 298.15 K).<sup>41</sup> No high pressure thermochemical data are available for solid (s) P<sub>white</sub> and P<sub>black</sub>. The value marked by \* was calculated in this SI section.

|                                   | $\Delta_f H^\circ$ (kJ mol <sup>-1</sup> ) | $\Delta_f G^\circ$ (kJ mol <sup>-1</sup> ) | $S^\circ$ (J K <sup>-1</sup> mol <sup>-1</sup> ) |
|-----------------------------------|--------------------------------------------|--------------------------------------------|--------------------------------------------------|
| H <sub>2</sub> <sup>38</sup> (l)  | 15.896                                     | -1.962                                     | 59.53                                            |
| N <sub>2</sub> <sup>39</sup> (l)  | 18.0449                                    | -                                          | 112.49                                           |
| NH <sub>3</sub> <sup>40</sup> (l) | -3.26005                                   | -19.4075*                                  | 89.81                                            |
| PH <sub>3</sub> <sup>41</sup> (l) | -9.50                                      | 25.36                                      | 120.1                                            |
| P <sub>white</sub> (s)            | -                                          | -                                          | -                                                |
| P <sub>black</sub> (s)            | -                                          | -                                          | -                                                |

High pressure data up to 5000 bar are available for H<sub>2</sub>, N<sub>2</sub> and NH<sub>3</sub>, but not for PH<sub>3</sub>, P<sub>4</sub> or P<sub>black</sub> (Supplementary Table 6).

At 5000 bar ( $\approx 0.5$  GPa) and 300 K NH<sub>3</sub>, N<sub>2</sub> and H<sub>2</sub> are liquid and the Gibbs energy for the reaction

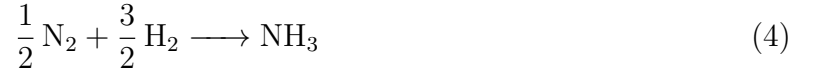

expressed as

$$\Delta_r G_{\text{NH}_3} = \Delta_f G_{\text{NH}_3} - \frac{1}{2} \Delta_f G_{\text{N}_2} - \frac{3}{2} \Delta_f G_{\text{H}_2} = \Delta_r H_{\text{NH}_3} - T \Delta_r S_{\text{NH}_3} \quad (5)$$

where

$$\Delta_r H_{\text{NH}_3} = \Delta_f H_{\text{NH}_3} - \frac{1}{2} \Delta_f H_{\text{N}_2} - \frac{3}{2} \Delta_f H_{\text{H}_2} \quad (6)$$

$$\Delta_r S = S_{\text{NH}_3} - \frac{1}{2} S_{\text{N}_2} - \frac{3}{2} S_{\text{H}_2} \quad (7)$$

decreases to  $-19.4 \text{ kJ mol}^{-1}$ , with respect to the standard conditions value of  $-16.3 \text{ kJ mol}^{-1}$ , indicating that the reaction becomes increasingly favorable at high pressure in the liquid phase. The detailed calculations are reported in the following thermochemical equations for standard conditions (0.1 MPa, 298.15 K):

$$\Delta_r H_{NH_3}^\circ = \Delta_f H_{NH_3}^\circ - \frac{1}{2} \Delta_f H_{N_2}^\circ - \frac{3}{2} \Delta_f H_{H_2}^\circ = -46.11 - \frac{1}{2}(0) - \frac{3}{2}(0) = -46.11 \text{ kJ mol}^{-1} \quad (8)$$

$$\Delta_r S_{NH_3}^\circ = S_{NH_3}^\circ - \frac{1}{2} S_{N_2}^\circ - \frac{3}{2} S_{H_2}^\circ = 192.45 - \frac{1}{2}(191.61) - \frac{3}{2}(130.684) = -99.381 \text{ J K}^{-1} \text{ mol}^{-1} \quad (9)$$

$$\begin{aligned} \Delta_r G_{NH_3}^\circ &= \Delta_f G_{NH_3}^\circ - \frac{1}{2} \Delta_f G_{N_2}^\circ - \frac{3}{2} \Delta_f G_{H_2}^\circ = \Delta_r H_{NH_3}^\circ - T \Delta_r S_{NH_3}^\circ = \\ &= -46.11 - (300)(-99.381 \cdot 10^{-3}) = -16.3 \text{ kJ mol}^{-1} \end{aligned} \quad (10)$$

and for high pressure (5000 bar and 300 K):

$$\begin{aligned} \Delta_r H_{NH_3} &= \Delta_f H_{NH_3} - \frac{1}{2} \Delta_f H_{N_2} - \frac{3}{2} \Delta_f H_{H_2} = -3.26005 - \frac{1}{2}(18.0449) - \frac{3}{2}(15.896) = \\ &= -36.1265 \text{ kJ mol}^{-1} \end{aligned} \quad (11)$$

$$\Delta_r S_{NH_3} = S_{NH_3} - \frac{1}{2} S_{N_2} - \frac{3}{2} S_{H_2} = 89.81 - \frac{1}{2}(112.49) - \frac{3}{2}(59.53) = -55.73 \text{ J K}^{-1} \text{ mol}^{-1} \quad (12)$$

$$\begin{aligned} \Delta_r G_{NH_3} &= \Delta_f G_{NH_3} - \frac{1}{2} \Delta_f G_{N_2} - \frac{3}{2} \Delta_f G_{H_2} = \Delta_r H_{NH_3} - T \Delta_r S_{NH_3} = \\ &= -36.1265 - (300)(-55.73 \cdot 10^{-3}) = -19.4 \text{ kJ mol}^{-1} \end{aligned} \quad (13)$$

A similar occurrence is expected also for the analogous reaction involving  $P_{\text{black}}$  instead of  $N_2$  and  $PH_3$  instead of  $NH_3$ , which is reported in this study

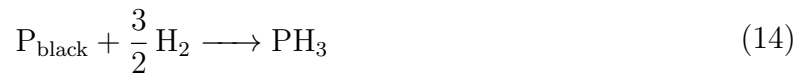

In this case the expression of the Gibbs energy of reaction is

$$\Delta_r G_{PH_3} = \Delta_f G_{PH_3} - \Delta_f G_{P_{\text{black}}} - \frac{3}{2} \Delta_f G_{H_2} = \Delta_r H_{PH_3} - T \Delta_r S_{PH_3} \quad (15)$$

where

$$\Delta_r H_{PH_3} = \Delta_f H_{PH_3} - \Delta_f H_{P_{\text{black}}} - \frac{3}{2} \Delta_f H_{H_2} \quad (16)$$

$$\Delta_r S = S_{PH_3} - S_{P_{\text{black}}} - \frac{3}{2} S_{H_2} \quad (17)$$

Nevertheless, the absence of high pressure thermochemical data about  $P_{\text{black}}$  and  $PH_3$ , does not allow a quantitative calculation. A very rough qualitative estimation can be attempted by assuming a similar enthalpy and entropy for  $P_{\text{black}}$  at standard (0.1 MPa, 300 K) and high pressure (5000 bar, 300 K) conditions ( $\Delta_f H_{P_{\text{black}}} \approx \Delta_f H_{P_{\text{black}}}^\circ$  and  $S_{P_{\text{black}}} \approx S_{P_{\text{black}}}^\circ$ ), basing on the consideration that the A17 *Cmce* crystalline structure of  $P_{\text{black}}$  remains the same across this pressure range,<sup>42</sup> and a similar enthalpy and entropy for liquid  $PH_3$  at standard (0.1 MPa, 300 K) and high pressure (5000 bar, 300 K) conditions ( $\Delta_f H_{PH_3} \approx \Delta_f H_{PH_3}^\circ$  and  $S_{PH_3} \approx S_{PH_3}^\circ$ ), for evaluating the following thermochemical equations at standard conditions (0.1 MPa, 298.15 K):



$$\Delta_r H_{PH_3}^\circ = \Delta_f H_{PH_3}^\circ - \Delta_f H_{P_{black}}^\circ - \frac{3}{2} \Delta_f H_{H_2}^\circ = 5.49 - (-12.851) - \frac{3}{2}(0) = 18.3 \text{ kJ mol}^{-1} \quad (18)$$

$$\Delta_r S_{PH_3}^\circ = S_{PH_3}^\circ - S_{P_{black}}^\circ - \frac{3}{2} S_{H_2}^\circ = 210.243 - (22.586) - \frac{3}{2}(130.684) = -8.369 \text{ J K}^{-1} \text{ mol}^{-1} \quad (19)$$

$$\begin{aligned} \Delta_r G_{PH_3}^\circ &= \Delta_f G_{PH_3}^\circ - \Delta_f G_{P_{black}}^\circ - \frac{3}{2} \Delta_f G_{H_2}^\circ = \Delta_r H_{PH_3}^\circ - T \Delta_r S_{PH_3}^\circ = \\ &18.3 - (300)(-8.369 \cdot 10^{-3}) = 20.8 \text{ kJ mol}^{-1} \end{aligned} \quad (20)$$

and at high pressure (5000 bar and 300 K):

$$\begin{aligned} \Delta_r H_{PH_3} &= \Delta_f H_{PH_3} - \Delta_f H_{P_{black}} - \frac{3}{2} \Delta_f H_{H_2} \\ &\approx \Delta_f H_{PH_3(liq)}^\circ - \Delta_f H_{P_{black}}^\circ - \frac{3}{2} \Delta_f H_{H_2}^\circ = \\ &-9.50 - (-12.851) - \frac{3}{2}(15.896) = -20.5 \text{ kJ mol}^{-1} \end{aligned} \quad (21)$$

$$\begin{aligned} \Delta_r S_{PH_3} &= S_{PH_3} - S_{P_{black}} - \frac{3}{2} S_{H_2} \\ &\approx S_{PH_3(liq)}^\circ - S_{P_{black}}^\circ - \frac{3}{2} S_{H_2}^\circ = \\ &120.1 - (22.586) - \frac{3}{2}(59.53) = 8.219 \text{ J K}^{-1} \text{ mol}^{-1} \end{aligned} \quad (22)$$

$$\begin{aligned} \Delta_r G_{PH_3} &= \Delta_f G_{PH_3} - \Delta_f G_{P_{black}} - \frac{3}{2} \Delta_f G_{H_2} = \Delta_r H_{PH_3} - T \Delta_r S_{PH_3} = \\ &-20.493 - (300)(8.219 \cdot 10^{-3}) = -23.0 \text{ kJ mol}^{-1} \end{aligned} \quad (23)$$

According to this qualitative estimation  $\Delta_r G_{PH_3}$  becomes negative at 5000 bar, highlighting

the role of pressure in favoring the formation of  $\text{PH}_3$ , as in the case of  $\text{NH}_3$ . Furthermore, in contrast to the reaction of formation of  $\text{NH}_3$ , which has a negative  $\Delta_r S_{\text{NH}_3}$  at high pressure, the positive  $\Delta_r S_{\text{PH}_3}$  for the reaction of formation of  $\text{PH}_3$  would suggest a role of temperature in the thermodynamic vs kinetic stability of the formation of  $\text{PH}_3$ .

It must be noted that the enthalpy of  $\text{P}_{\text{black}}$  reported by Wagman et al.<sup>41</sup> ( $\Delta_f H_{\text{P}_{\text{black}}}^\circ = -39.3$   $\text{kJ mol}^{-1}$ ) significantly differs with respect to the more recent value provided by Chase et al.<sup>37</sup> ( $\Delta_f H_{\text{P}_{\text{black}}}^\circ = -12.851$   $\text{kJ mol}^{-1}$ ), which was used in the previous thermochemical equations. If adopting the  $\Delta_f H_{\text{P}_{\text{black}}}^\circ$  value reported by Wagman et al., the following thermochemical data are obtained at standard conditions (0.1 MPa, 298.15 K):

$$\Delta_r H_{\text{PH}_3}^\circ = \Delta_f H_{\text{PH}_3}^\circ - \Delta_f H_{\text{P}_{\text{black}}}^\circ - \frac{3}{2} \Delta_f H_{\text{H}_2}^\circ = 5.49 - (-39.3) - \frac{3}{2}(0) = 44.8 \text{ kJmol}^{-1} \quad (24)$$

$$\Delta_r S_{\text{PH}_3}^\circ = S_{\text{PH}_3}^\circ - S_{\text{P}_{\text{black}}}^\circ - \frac{3}{2} S_{\text{H}_2}^\circ = 210.243 - (22.586) - \frac{3}{2}(130.684) = -8.369 \text{ J K}^{-1} \text{ mol}^{-1} \quad (25)$$

$$\begin{aligned} \Delta_r G_{\text{PH}_3}^\circ &= \Delta_f G_{\text{PH}_3}^\circ - \Delta_r G_{\text{P}_{\text{black}}}^\circ - \frac{3}{2} \Delta_r G_{\text{H}_2}^\circ = \Delta_r H_{\text{PH}_3}^\circ - T \Delta_r S_{\text{PH}_3}^\circ = \\ &44.8 - (300)(-8.369 \cdot 10^{-3}) = 47.3 \text{ kJ mol}^{-1} \end{aligned} \quad (26)$$

and at high pressure (5000 bar and 300 K):

$$\begin{aligned} \Delta_r H_{\text{PH}_3} &= \Delta_f H_{\text{PH}_3} - \Delta_f H_{\text{P}_{\text{black}}} - \frac{3}{2} \Delta_f H_{\text{H}_2} \approx \Delta_f H_{\text{PH}_3(\text{liq})}^\circ - \Delta_f H_{\text{P}_{\text{black}}}^\circ - \frac{3}{2} \Delta_f H_{\text{H}_2}^\circ = \\ &-9.50 - (-39.3) - \frac{3}{2}(15.896) = 5.96 \text{ kJ mol}^{-1} \end{aligned} \quad (27)$$

$$\begin{aligned}\Delta_r S_{PH_3} &= S_{PH_3} - S_{P_{black}} - \frac{3}{2}S_{H_2} \approx S_{PH_3(lig)}^\circ - S_{P_{black}}^\circ - \frac{3}{2}S_{H_2} = \\ &120.1 - (22.586) - \frac{3}{2}(59.53) = 8.219 \text{ J K}^{-1} \text{ mol}^{-1}\end{aligned}\quad (28)$$

$$\begin{aligned}\Delta_r G_{PH_3} &= \Delta_f G_{PH_3}^\circ - \Delta_f G_{P_{black}}^\circ - \frac{3}{2}\Delta_f G_{H_2} = \Delta_r H_{PH_3} - T\Delta_r S_{PH_3} = \\ &5.96 - (300)(8.219 \cdot 10^{-3}) = 3.49 \text{ kJ mol}^{-1}\end{aligned}\quad (29)$$

Even if not becoming negative, also in this case  $\Delta_r G_{PH_3}$  decreases with increasing pressure, highlighting the key role of pressure in favoring the reaction.

Finally, without appropriate experimental data and calculations, it can not be excluded that, in presence of unfavorable thermodynamics with an equilibrium constant  $\ll 1$ , pressure can shift the equilibrium towards the formation of  $PH_3$  and trap the system into a kinetically controlled reactivity, with temperature helping to overcome energetic barrier.

## Supplementary Note 10

**IR based evidence of  $(\text{H}_2\text{S})_2\text{H}_2$  phase I to have  $I4cm$  rather than  $I4/mcm$  structure.** During the reviewing period, we realized that that Pace et al. just published a paper about the phase diagram of  $(\text{H}_2\text{S})_2\text{H}_2$  at higher pressure than previously reported in literature.<sup>43</sup> Whereas the paper does not pay much attention to the low pressure region, it shows the first infrared spectra of  $(\text{H}_2\text{S})_2\text{H}_2$  in the crystal phase I, whose structure was proposed to be  $I4/mcm$  by Strobel et al.<sup>20</sup> The pressure evolution of the infrared active vibrational frequencies and the infrared spectrum of the crystalline phase I at 7.2 GPa, reported respectively in Fig. 2 and 3 of the new paper by Pace et al., clearly show the presence of an infrared active band at  $\sim 4150\text{ cm}^{-1}$ , which, according to group theory analysis performed in our study, is consistent with the  $I4cm$  structure, but not with the  $I4/mcm$  one. This new evidence supports our suggestion of phase I of  $(\text{H}_2\text{S})_2\text{H}_2$  (and hence likely also of  $(\text{H}_2\text{Se})_2\text{H}_2$  and  $(\text{HI})_2\text{H}_2$ , see text) to be isostructural with  $(\text{PH}_3)_2\text{H}_2$  and to belong to the  $I4cm$  lower symmetry group rather than to the  $I4/mcm$  higher symmetry one, as indeed hypothesized by Strobel et al. themselves.<sup>20</sup>

Even more recently, while studying the first room-temperature superconductor in the C-S-H system, Snider et al. in the Methods section of their article, under the “Simulations of initial photochemical products at 4.0 GPa” heading, noted that the previously reported  $I4/mcm$  space group symmetry of  $(\text{H}_2\text{S})_2\text{H}_2$  structure seems too high, particularly concerning the positions of the H atoms.<sup>44</sup> Furthermore, considering the presence of weak H-bonding between  $\text{H}_2\text{S}$  molecules, in the  $I4/mcm$  symmetry the arrangement of the  $\text{H}_2\text{S}$  molecules would violate the Bernal–Fowler “ice rules”. The authors thus hypothesized that the actual symmetry of this phase may be lower than previously believed.

## Acknowledgement

Thanks are expressed to EC through the European Research Council (ERC) for funding the project PHOSFUN “Phosphorene functionalization: a new platform for advanced multifunctional materials” (Grant Agreement No. 670173) through an ERC Advanced Grant. This study was supported also by the Deep Carbon Observatory (DCO) initiative under the project *Physics and Chemistry of Carbon at Extreme Conditions*, by the project “GreenPhos - alta pressione”, by the Italian Ministero dell’Istruzione, dell’Università e della Ricerca (MIUR), by Ente Cassa di Risparmio dhavè beeni Firenze under the project Firenze Hydrolab2.0 and by Fondazione Cassa di Risparmio di Firenze under the project HP-PHOTOCHEM. The authors acknowledge the European Synchrotron Radiation Facility (ESRF) for provision of synchrotron radiation facilities and thank G. Garbarino, M. Mezouar and J. Jacobs for assistance in using beamline ID27. The authors would like to thank Prof. Roberto Righini for useful discussions.

## Supplementary References

- (1) Prescher, C.; Prakapenka, V. B. DIOPTAS: a program for reduction of two-dimensional X-ray diffraction data and data exploration. *High. Press. Res.* **2015**, *35*, 223–230.
- (2) Diffraction, R. O. CrysAlisPro Software system. *CrysAlisPro* **2018**, *version 1.171.39.46*.
- (3) Sheldrick, G. M. Crystal structure refinement with *SHELXL*. *Acta Crystallogr. C* **2015**, *71*, 3–8.
- (4) Petříček, V.; Dušek, M.; Palatinus, L. Crystallographic Computing System JANA2006: General features. *Z. Krist.-Cryst. Mater.* **2014**, *229*, 345–352.
- (5) Natta, G.; Casazza, E. La struttura dell’idrogeno fosforato (PH<sub>3</sub>) e dell’idrogeno arsenicale (AsH<sub>3</sub>). *Gazz. Chim. Ital.* **1930**, *60*, 851 – 859.

- (6) Ninet, S.; Datchi, F. High pressure–high temperature phase diagram of ammonia. *J. Chem. Phys.* **2008**, *128*, 154508.
- (7) Cotton, F. A.; Wilkinson, G.; Murillo, C. A.; Bochmann, M. *Advanced inorganic chemistry*, 6th ed.; John Wiley & Sons, 1999.
- (8) Chambers, C.; Holliday, A. K. *Modern inorganic chemistry*; Butterworth Scientific, 1982.
- (9) Atkins, P.; Overton, T.; Rourke, J.; Weller, M.; Armstrong, F. *Shriver and Atkins' Inorganic Chemistry*, 5th ed.; W. H. Freeman, 2010.
- (10) Weaver, J. R.; Parry, R. W. Dipole Moment Studies. IV. Trends in Dipole Moments. *Inorg. Chem.* **1966**, *5*, 718–723.
- (11) Burrus, C. A. Stark Effect from 1.1 to 2.6 Millimeters Wavelength : PH<sub>3</sub>, PD<sub>3</sub>, DI, and CO. *J. Chem. Phys.* **1958**, *28*, 427–429.
- (12) Wojdyr, M. *Fityk*: a general-purpose peak fitting program. *J. Appl. Cryst.* **2010**, *43*, 1126–1128.
- (13) Winchester, R.; Whitby, M.; Shaffer, M. Synthesis of Pure Phosphorus Nanostructures. *Angew. Chem. Int. Ed.* **2009**, *48*, 3616–3621.
- (14) Olego, D.; Baumann, J.; Kuck, M.; Schachter, R.; Michel, C.; Raccah, P. The microscopic structure of bulk amorphous red phosphorus: A Raman scattering investigation. *Solid State Commun.* **1984**, *52*, 311 – 314.
- (15) Zaug, J. M.; Soper, A. K.; Clark, S. M. Pressure-dependent structures of amorphous red phosphorus and the origin of the first sharp diffraction peaks. *Nat. Mater.* **2008**, *7*, 890–899.

- (16) Yuan, Y.; Li, Y.; Fang, G.; Liu, G.; Pei, C.; Li, X.; Zheng, H.; Yang, K.; Wang, L. Stoichiometric evolutions of  $\text{PH}_3$  under high pressure: implication for high- $T_c$  superconducting hydrides. *Natl. Sci. Rev.* **2019**, *6*, 524–531.
- (17) Hahn, T. In *International Tables for Crystallography Volume A: Space Group Symmetry*, 5th ed.; Hahn, T., Ed.; Springer Netherlands: Dordrecht, 2005; Vol. A.
- (18) Decius, J.; Hexter, R. *Molecular Vibrations in Crystals*; McGraw-Hill, 1977.
- (19) Cliffe, M. J.; Goodwin, A. L. *PASCal*: a principal axis strain calculator for thermal expansion and compressibility determination. *J. Appl. Cryst.* **2012**, *45*, 1321–1329.
- (20) Strobel, T. A.; Ganesh, P.; Somayazulu, M.; Kent, P. R. C.; Hemley, R. J. Novel Cooperative Interactions and Structural Ordering in  $\text{H}_2\text{S}-\text{H}_2$ . *Phys. Rev. Lett.* **2011**, *107*, 255503.
- (21) Hemley, R. J.; Mao, H. K.; Finger, L. W.; Jephcoat, A. P.; Hazen, R. M.; Zha, C. S. Equation of state of solid hydrogen and deuterium from single-crystal x-ray diffraction to 26.5 GPa. *Phys. Rev. B* **1990**, *42*, 6458–6470.
- (22) Somayazulu, M. S.; Finger, L. W.; Hemley, R. J.; Mao, H. K. High-Pressure Compounds in Methane-Hydrogen Mixtures. *Science* **1996**, *271*, 1400–1402.
- (23) Strobel, T. A.; Somayazulu, M.; Hemley, R. J. Novel Pressure-Induced Interactions in Silane-Hydrogen. *Phys. Rev. Lett.* **2009**, *103*, 065701.
- (24) Strobel, T. A.; Chen, X.-J.; Somayazulu, M.; Hemley, R. J. Vibrational dynamics, intermolecular interactions, and compound formation in  $\text{GeH}_4-\text{H}_2$  under pressure. *J. Chem. Phys.* **2010**, *133*, 164512.
- (25) Laniel, D.; Svitlyk, V.; Weck, G.; Loubeyre, P. Pressure-induced chemical reactions in the  $\text{N}_2(\text{H}_2)_2$  compound: from the  $\text{N}_2$  and  $\text{H}_2$  species to ammonia and back down into hydrazine. *Phys. Chem. Chem. Phys.* **2018**, *20*, 4050–4057.

- (26) Ciezak, J. A.; Jenkins, T. A.; Hemley, R. J. Optical and Raman microspectroscopy of nitrogen and hydrogen mixtures at high pressure. *AIP Conf. Proc.* **2009**, *1195*, 1291–1294.
- (27) Loubeyre, P.; LeToullec, R. Stability of O<sub>2</sub>/H<sub>2</sub> mixtures at high pressure. *Nature* **1995**, *378*, 44–46.
- (28) Vos, W. L.; Finger, L. W.; Hemley, R. J.; Mao, H.-k. Novel H<sub>2</sub>-H<sub>2</sub>O clathrates at high pressures. *Phys. Rev. Lett.* **1993**, *71*, 3150–3153.
- (29) Pace, E. J.; Binns, J.; Peña Alvarez, M.; Dalladay-Simpson, P.; Gregoryanz, E.; Howie, R. T. Synthesis and stability of hydrogen selenide compounds at high pressure. *J. Chem. Phys.* **2017**, *147*, 184303.
- (30) Binns, J.; Liu, X.-D.; Dalladay-Simpson, P.; Afonina, V.; Gregoryanz, E.; Howie, R. T. Synthesis and stability of hydrogen iodide at high pressures. *Phys. Rev. B* **2017**, *96*, 144105.
- (31) Ulivi, L.; Bini, R.; Loubeyre, P.; LeToullec, R.; Jodl, H. J. Spectroscopic studies of the Ar(H<sub>2</sub>)<sub>2</sub> compound crystal at high pressure and low temperatures. *Phys. Rev. B* **1999**, *60*, 6502–6512.
- (32) Kleppe, A. K.; Amboage, M.; Jephcoat, A. P. New high-pressure van der Waals compound Kr(H<sub>2</sub>)<sub>4</sub> discovered in the krypton-hydrogen binary system. *Sci. Rep.* **2014**, *4*, 4989.
- (33) Somayazulu, M.; Dera, P.; Goncharov, A. F.; Gramsch, S. A.; Liermann, P.; Yang, W.; Liu, Z.; Mao, H.-k.; Hemley, R. J. Pressure-induced bonding and compound formation in xenon–hydrogen solids. *Nat. Chem.* **2010**, *2*, 50–53.
- (34) Somayazulu, M.; Dera, P.; Smith, J.; Hemley, R. J. Structure and stability of solid Xe(H<sub>2</sub>)<sub>n</sub>. *J. Chem. Phys.* **2015**, *142*, 104503.



- (35) Büchel, K. H.; Moretto, H.-H. M.; Werner, D. *Industrial inorganic chemistry*, 2nd ed.; Wiley-VCH, 2000.
- (36) Atkins, P.; de Paula, J.; Keeler, J. *Atkins Physical Chemistry*, 11th ed.; Oxford University Press, 2018.
- (37) Chase, M. W. J. NIST-JANAF Thermochemical Tables, Fourth Edition. *J. Phys. Chem. Ref. Data* **1998**, *Monograph 9*, 1348.
- (38) Hemmes, H.; Driessen, A.; Griessen, R. Thermodynamic properties of hydrogen at pressures up to 1 Mbar and temperatures between 100 and 1000K. *J. Phys. C Solid State Phys.* **1986**, *19*, 3571.
- (39) Jacobsen, R. T.; Stewart, R. B. Thermodynamic Properties of Nitrogen Including Liquid and Vapor Phases from 63K to 2000K with Pressures to 10,000 Bar. *J. Phys. Chem. Ref. Data* **1973**, *2*, 757–922.
- (40) Haar, L.; Gallagher, J. S. Thermodynamic properties of ammonia. *J. Phys. Chem. Ref. Data* **1978**, *7*, 635–792.
- (41) Wagman, D. D.; Evans, W. H.; Parker, V. B.; Schumm, R. H.; Halow, I.; Balley, S. M.; Churney, K. L.; Nuttal, R. L. The NBS Tables of Chemical Thermodynamic Properties: Selected Values for Inorganic and C1 and C2 Organic Substances in SI Units. *J. Phys. Chem. Ref. Data* **1982**, *11*, 1–407.
- (42) Scelta, D.; Baldassarre, A.; Serrano-Ruiz, M.; Dziubek, K.; Cairns, A. B.; Peruzzini, M.; Bini, R.; Ceppatelli, M. Interlayer Bond Formation in Black Phosphorus at High Pressure. *Angew. Chem. Int. Ed.* **2017**, *56*, 14135–14140.
- (43) Pace, E. J.; Liu, X.-D.; Dalladay-Simpson, P.; Binns, J.; Peña Alvarez, M.; Attfield, J. P.; Howie, R. T.; Gregoryanz, E. Properties and phase diagram of  $(\text{H}_2\text{S})_2\text{H}_2$ . *Phys. Rev. B* **2020**, *101*, 174511.

- (44) Snider, E.; Dasenbrock-Gammon, N.; McBride, R.; Debessai, M.; Vindana, H.; Venkatasamy, K.; Lawler, K. V.; Salamat, A.; Dias, R. P. Room-temperature superconductivity in a carbonaceous sulfur hydride. *Nature* **2020**, *586*, 373–377.
